# Supplementary material for: Genome-Wide DNA Methylation and Gene Expression Profiles in Cows Subjected to Different Stress Level as Assessed by Cortisol in Milk
Source: Genes (Basel). 2020 Jul 25;11(8):850. doi: 10.3390/genes11080850 (PMC7464205; doi:10.3390/genes11080850)
Supplement: Supplementary file 1 [file genes-11-00850-s001.zip]

Archive with 7 entries (7 files):
- Supplementary Table S4.xlsx
- Supplementary Table S5.xlsx
- Supplementary Table S6.xlsx
- Supplementary Fig. S1.pdf
- Supplementary Table S1.xlsx
- Supplementary Table S2.xlsx
- Supplementary Table S3.xlsx
