# Supplementary material for: Genome-Wide DNA Methylation and Gene Expression Profiles in Cows Subjected to Different Stress Level as Assessed by Cortisol in Milk
Source: Genes (Basel). 2020 Jul 25;11(8):850. doi: 10.3390/genes11080850 (PMC7464205; doi:10.3390/genes11080850)
Supplement: Supplementary file 1 [file genes-11-00850-s001.zip › Supplementary Table S1.xlsx]

## Sheet: Stats
Status	Total Number of reads	Paired End Reads	Mapping Percentage	Mapped Paired End Reads	Bisulfite conversion rate (%)
High	26167326	11933663	0.364733	4352602	99.14
High	30327138	14663569	0.355957	5219593	99.31
High	24968888	12984444	0.363719	4722691	99.01
High	26014624	13807312	0.256444	3540809	99.09
High	30009576	14504788	0.356156	5165970	99.02
High	25913064	11456532	0.329364	3773373	99.39
High	25520404	10760202	0.370162	3983020	99.18
High	32047902	18023951	0.317685	5725940	99.15
High	29515196	16757598	0.414911	6952914	99.33
High	27622286	14311143	0.385863	5522142	99.16
Low	22692416	11546208	0.340456	3930980	99.07
Low	27188900	14594450	0.308988	4509507	99.29
Low	26381192	12190596	0.318066	3877414	99.12
Low	30950274	15475137	0.326031	5045381	99.09
Low	25447332	14223665	0.394205	5607035	99.05
Low	26540894	12970447	0.348988	4526530	99.18
Low	26331006	11665503	0.427727	4989651	99.24
Low	25042208	13021104	0.396824	5167091	99.04
Low	22552404	11276202	0.374593	4223984	99.28
Low	29247024	15123512	0.335299	5070902	99.11
