# Supplementary material for: Genome-Wide DNA Methylation and Gene Expression Profiles in Cows Subjected to Different Stress Level as Assessed by Cortisol in Milk
Source: Genes (Basel). 2020 Jul 25;11(8):850. doi: 10.3390/genes11080850 (PMC7464205; doi:10.3390/genes11080850)
Supplement: Supplementary file 1 [file genes-11-00850-s001.zip › Supplementary Table S2.xlsx]

## Sheet: DMRs_qvalue0.05
ensembl_gene_id	gene	window	qvalue	meth.diff	five_prime_UTR	intron	exon	three_prime_UTR	rna_type	biological_region	promoter	description
ENSBTAG00000002125	GNAL	chr24:42669653-42670652	3.01321e-09	20.978	0	0	0	0	0	1	1	G protein subunit alpha L [Source:VGNC Symbol;Acc:VGNC:29452]
ENSBTAG00000002580	MYH14	chr18:56446068-56447067	1.43488e-12	15.2858	0	2	2	0	0	0	0	myosin heavy chain 14 [Source:VGNC Symbol;Acc:VGNC:31796]
ENSBTAG00000014450	NOSIP	chr18:55990259-55991258	6.78355e-24	14.6957	0	2	3	1	0	5	0	nitric oxide synthase interacting protein [Source:VGNC Symbol;Acc:VGNC:32175]
ENSBTAG00000004398	IMMP2L	4:57275795-57276795	8.52385e-10	12.3775	0	1	0	0	0	0	0	inner mitochondrial membrane peptidase subunit 2 [Source:VGNC Symbol;Acc:VGNC:57350]
ENSBTAG00000027316	UBE2V1	chr13:78133951-78134950	7.93552e-11	10.6858	0	1	0	0	0	0	0	ubiquitin conjugating enzyme E2 V1 [Source:NCBI gene;Acc:617771]
ENSBTAG00000007509	CACNG8	chr18:61638295-61639294	4.93668e-09	10.4337	0	1	0	0	0	1	0
ENSBTAG00000035744	TRIM26	chr23:28785843-28786825	2.17482e-17	10.3131	0	0	1	0	0	0	0
ENSBTAG00000000753	PIAS4	chr7:19992035-19993034	1.21726e-05	10.1134	0	1	0	0	0	0	0	protein inhibitor of activated STAT 4 [Source:VGNC Symbol;Acc:VGNC:32858]
	firstef-cpg	chr18:11517076-11518075	6.10134e-08	9.85429	0	0	0	0	0	3	0
	cpg-firstef	chr9:101250969-101251968	9.63698e-08	9.38917	0	0	0	0	0	2	0
	cpg	chr7:107746452-107747451	1.6864e-06	8.89445	0	0	0	0	0	1	0
	cpg	chr8:110715001-110716000	4.15021e-28	8.85358	0	0	0	0	0	1	0
	cpg	chr28:43077001-43078000	1.03788e-15	8.70247	0	0	0	0	0	1	0
ENSBTAG00000018901	CTIF	chr24:48531031-48532030	1.14698e-15	8.53089	0	1	0	0	0	0	0	cap binding complex dependent translation initiation factor [Source:VGNC Symbol;Acc:VGNC:27797]
	firstef	chr16:1375555-1376554	6.34099e-10	8.52368	0	0	0	0	0	2	0
	eponine	chr13:49005001-49006000	4.29841e-68	8.46565	0	0	0	0	0	1	0
	firstef	chr1:49914213-49914944	3.44904e-11	8.20386	0	0	0	0	0	1	0
	protein_coding	chr7:52447936-52448935	7.27653e-08	7.92108	0	0	1	0	0	1	0
	miRNA-miRNA_gene539-ENSBTAE00000312674	chr21:65942648-65943647	0.00172851	7.88656	0	0	1	0	2	0	0
ENSBTAG00000012016	LMTK3	chr18:55166672-55167662	7.73276e-06	7.81798	0	0	1	0	0	1	0	lemur tyrosine kinase 3 [Source:VGNC Symbol;Acc:VGNC:30942]
ENSBTAG00000012970	FAM53B	chr26:44303181-44304180	3.6096e-07	7.81665	0	1	0	0	0	0	0	family with sequence similarity 53 member B [Source:VGNC Symbol;Acc:VGNC:55949]
	cpg	chrX:87307244-87308243	1.64169e-12	7.66413	0	0	0	0	0	1	0
	protein_coding	chr5:103318266-103318561	0.00058393	7.25776	0	1	0	0	0	0	0
	eponine	chr3:1049001-1050000	4.52502e-09	7.18341	0	0	0	0	0	1	0
	protein_coding	chr18:1843376-1844375	0.000176594	7.17473	0	2	1	0	0	2	0
	firstef	chr23:44966406-44967405	0.00526447	7.04579	0	0	0	0	0	1	0
ENSBTAG00000002539	TRIOBP	chr5:109548917-109549916	0.0100736	7.01949	0	2	3	0	0	1	0	TRIO and F-actin binding protein [Source:VGNC Symbol;Acc:VGNC:36357]
	cpg-firstef	chr25:35728145-35728676	1.38422e-69	6.88153	0	0	0	0	0	2	0
ENSBTAG00000000711	NDRG1	chr14:8072511-8073088	4.89785e-07	6.80616	1	1	1	0	0	10	1	N-myc downstream regulated 1 [Source:VGNC Symbol;Acc:VGNC:53868]
	trnascan	chr5:114584659-114585658	0.000256244	6.77683	0	0	0	0	0	1	0
ENSBTAG00000010177	GOLT1A	chr16:1967403-1968202	0.00418889	6.56052	0	2	1	0	0	1	0	golgi transport 1A [Source:VGNC Symbol;Acc:VGNC:29494]
ENSBTAG00000015119	SIK3	chr15:27542362-27543361	0.00581251	6.5351	0	3	2	0	0	0	0	SIK family kinase 3 [Source:VGNC Symbol;Acc:VGNC:34620]
	cpg	chr3:64412001-64413000	1.08634e-12	6.46903	0	0	0	0	0	1	0
	eponine	chr4:41477001-41478000	1.98818e-24	6.2323	0	0	0	0	0	2	0
	protein_coding	chr6:115111108-115111927	0.035182	6.18369	0	1	0	0	0	1	0
	trnascan	chr11:103186716-103187715	6.46058e-06	6.18308	0	0	0	0	0	1	0
	protein_coding	chr6:71823226-71824225	0.0197226	6.13175	0	4	2	0	0	0	0
ENSBTAG00000038992	STK11IP	chr2:107527972-107528233	7.99814e-07	5.91105	0	3	2	0	0	0	0	serine/threonine kinase 11 interacting protein [Source:VGNC Symbol;Acc:VGNC:35386]
	cpg	chr27:37605001-37606000	2.17088e-05	5.88259	0	0	0	0	0	1	0
	protein_coding	chr18:1844480-1845374	0.00246465	5.75463	0	1	1	0	0	0	0
ENSBTAG00000027081	ATP10A	chr21:2815915-2816914	0.0138079	5.62468	0	1	0	0	0	3	0	ATPase phospholipid transporting 10A (putative) [Source:HGNC Symbol;Acc:HGNC:13542]
ENSBTAG00000003051	FER	chr7:108265565-108266564	0.00453262	5.56038	0	1	0	0	0	1	0	FER tyrosine kinase [Source:VGNC Symbol;Acc:VGNC:28948]
ENSBTAG00000046012	SOWAHD	chrX:4121616-4122615	0.00930807	5.55398	0	0	1	0	0	9	0	sosondowah ankyrin repeat domain family member D [Source:VGNC Symbol;Acc:VGNC:35139]
ENSBTAG00000011782	CHGB	chr13:48080218-48081217	0.0001529	5.5368	0	1	1	0	0	0	0	chromogranin B [Source:VGNC Symbol;Acc:VGNC:27290]
ENSBTAG00000027081	ATP10A	chr21:2816915-2817914	0.0238911	5.53626	0	1	0	0	0	1	0	ATPase phospholipid transporting 10A (putative) [Source:HGNC Symbol;Acc:HGNC:13542]
ENSBTAG00000010659	CUX1	25:35021683-35022683	3.74712e-12	5.51805	0	1	0	0	0	1	0	cut like homeobox 1 [Source:VGNC Symbol;Acc:VGNC:27839]
	eponine	chr4:41887794-41888122	1.19545e-27	5.50535	0	0	0	0	0	1	0
	firstef	chr14:1291895-1292894	0.0134927	5.46088	0	0	0	0	0	1	0
ENSBTAG00000015915	SBSN	chr18:46189298-46190297	0.0155738	5.45159	0	0	1	0	0	0	0	suprabasin [Source:VGNC Symbol;Acc:VGNC:34310]
ENSBTAG00000017970	ZYX	chr4:106782541-106783540	1.53256e-06	5.42458	0	1	0	0	0	0	0	zyxin [Source:VGNC Symbol;Acc:VGNC:37395]
ENSBTAG00000001579	2002-08-01	14:3101462-3102462	7.1127e-25	5.40385	0	0	0	0	0	3	1	argonaute RISC catalytic component 2 [Source:VGNC Symbol;Acc:VGNC:50167]
ENSBTAG00000009775	PRRG3	chrX:34176523-34177522	0.0144998	5.35849	0	1	0	0	0	0	0	proline rich and Gla domain 3 [Source:VGNC Symbol;Acc:VGNC:33408]
	firstef-eponine	chr5:26355687-26356686	0.000339144	5.21814	0	0	0	0	0	3	0
	protein_coding	chrX:59872763-59873762	0.015752	5.12992	0	2	1	0	0	4	0
ENSBTAG00000019146	OSBP2	chr17:69727001-69728000	0.0226617	5.08857	0	1	0	0	0	0	0	oxysterol binding protein 2 [Source:VGNC Symbol;Acc:VGNC:32457]
ENSBTAG00000021919	NAV1	chr16:80706587-80707586	0.000100922	5.04827	0	1	0	0	0	3	0	neuron navigator 1 [Source:VGNC Symbol;Acc:VGNC:59352]
ENSBTAG00000008952	RAP1GAP	chr2:131157736-131158069	0.0176208	5.01314	0	1	0	0	0	0	0	RAP1 GTPase activating protein [Source:VGNC Symbol;Acc:VGNC:33716]
	firstef	chr5:103306809-103307133	7.21253e-06	5.00078	0	0	0	0	0	1	0
ENSBTAG00000017697	CTF1	chr25:26971604-26971998	0.000365942	4.98038	0	1	1	0	0	2	0	cardiotrophin 1 [Source:VGNC Symbol;Acc:VGNC:27793]
ENSBTAG00000007603	HOXB1	chr19:37959008-37960007	0.0393693	4.90307	0	0	1	0	0	0	0	homeobox B1 [Source:VGNC Symbol;Acc:VGNC:29916]
	cpg	chr26:50732696-50733695	0.019839	4.82112	0	0	0	0	0	1	0
ENSBTAG00000020225	TBXAS1	chr4:103356927-103357926	0.0110442	4.7928	0	1	0	0	0	0	0	thromboxane A synthase 1 [Source:VGNC Symbol;Acc:VGNC:35674]
	cpg	chr7:12110001-12111000	1.91375e-05	4.79255	0	0	0	0	0	1	0
ENSBTAG00000046176	SPEG	chr2:107423056-107423819	0.0258954	4.7904	0	1	1	1	0	1	1	striated muscle enriched protein kinase [Source:VGNC Symbol;Acc:VGNC:52830]
ENSBTAG00000007439	TENM4	chr29:17152998-17153288	0.00109317	4.77842	0	1	1	0	0	3	0	teneurin transmembrane protein 4 [Source:VGNC Symbol;Acc:VGNC:35744]
	protein_coding	chrX:3281156-3282155	0.0020985	4.77451	2	2	2	0	0	5	0
ENSBTAG00000002485	TNS1	chr2:106009591-106010590	0.0396858	4.73467	0	2	1	0	0	0	0	tensin 1 [Source:VGNC Symbol;Acc:VGNC:36207]
	firstef	chr13:28058745-28059744	0.00366398	4.73212	0	0	0	0	0	1	0
	firstef-cpg	chr18:59748581-59749580	0.00117196	4.66354	0	0	0	0	0	3	0
ENSBTAG00000045498	SULT2B1	chr18:55246246-55247048	0.0130923	4.59386	0	1	1	0	0	0	0	sulfotransferase family 2B member 1 [Source:VGNC Symbol;Acc:VGNC:35468]
	cpg-eponine	chr18:63507936-63508935	0.00851411	4.57266	0	0	0	0	0	2	0
	cpg-firstef	chr3:100737157-100738156	0.000618099	4.47846	0	0	0	0	0	2	0
	cpg-firstef-eponine	chr6:116593715-116594714	0.000433137	4.43685	0	0	0	0	0	5	0
ENSBTAG00000010659	CUX1	25:34706942-34707942	5.03177e-05	4.39323	0	1	0	0	0	1	0	cut like homeobox 1 [Source:VGNC Symbol;Acc:VGNC:27839]
ENSBTAG00000006095	PRDM13	chr9:50196651-50197650	0.00172956	4.3872	0	0	1	0	0	7	0	PR/SET domain 13 [Source:VGNC Symbol;Acc:VGNC:33291]
	cpg	chr19:43240262-43241261	0.00518549	4.37208	0	0	0	0	0	1	0
ENSBTAG00000013598	RSPO2	chr14:56384098-56385097	6.86726e-05	4.36917	0	0	0	0	0	11	1	R-spondin 2 [Source:VGNC Symbol;Acc:VGNC:34189]
ENSBTAG00000013725	RBSN	chr22:57192417-57193416	0.00187031	4.36438	0	1	1	0	0	1	0	rabenosyn, RAB effector [Source:VGNC Symbol;Acc:VGNC:33818]
	protein_coding	chr11:98785111-98786110	0.0205933	4.33988	0	2	2	2	0	1	0
ENSBTAG00000008952	RAP1GAP	chr2:131156665-131156680	2.04863e-07	4.33906	0	1	0	0	0	0	0	RAP1 GTPase activating protein [Source:VGNC Symbol;Acc:VGNC:33716]
	protein_coding	chr18:53697462-53698461	0.00697971	4.33483	0	6	7	0	0	2	0
ENSBTAG00000021287	SLC16A7	chr5:53892133-53893132	5.88228e-10	4.32499	1	1	1	0	0	16	0	solute carrier family 16 member 7 [Source:VGNC Symbol;Acc:VGNC:34693]
	cpg	chrX:28506001-28507000	1.86816e-13	4.28868	0	0	0	0	0	1	0
ENSBTAG00000021464	SPRYD3	chr5:26900965-26901327	2.0634e-05	4.21226	0	2	2	0	0	0	0	SPRY domain containing 3 [Source:VGNC Symbol;Acc:VGNC:35245]
ENSBTAG00000020552	PRDM2	chr16:53831055-53832054	0.000269755	4.19195	0	0	1	0	0	0	0	PR/SET domain 2 [Source:VGNC Symbol;Acc:VGNC:33295]
ENSBTAG00000030599	SMOC1	chr10:81688667-81689666	0.0281852	4.18741	0	1	0	0	0	1	0	SPARC related modular calcium binding 1 [Source:VGNC Symbol;Acc:VGNC:35026]
ENSBTAG00000009974	TSNARE1	chr14:1996396-1996759	0.0185297	4.17311	0	1	0	0	0	0	0	t-SNARE domain containing 1 [Source:VGNC Symbol;Acc:VGNC:36423]
ENSBTAG00000015773	LRGUK	4:97809534-97810534	2.1705e-09	4.12623	0	1	0	0	0	1	0	leucine rich repeats and guanylate kinase domain containing [Source:VGNC Symbol;Acc:VGNC:52794]
ENSBTAG00000000265	SYNPR	22:37966141-37967141	1.26856e-15	4.12421	0	1	0	0	0	1	0	synaptoporin [Source:VGNC Symbol;Acc:VGNC:35532]
ENSBTAG00000021566	PAX2	chr26:21605023-21606022	0.0396509	4.12071	0	2	1	0	0	6	0	paired box 2 [Source:VGNC Symbol;Acc:VGNC:32596]
	cpg	chr8:56724001-56725000	0.00137432	4.11118	0	0	0	0	0	1	0
	firstef-cpg	chrX:64048001-64049000	9.92759e-07	4.07413	0	0	0	0	0	2	0
	cpg	chr11:79828001-79829000	0.00512754	4.06221	0	0	0	0	0	1	0
	cpg	chr21:2123001-2124000	1.10512e-12	4.05848	0	0	0	0	0	1	0
ENSBTAG00000000097	EFCAB14	chr3:99422184-99422650	0.00345874	4.04371	0	1	1	0	0	2	0	EF-hand calcium binding domain 14 [Source:VGNC Symbol;Acc:VGNC:28342]
ENSBTAG00000046485	RAB1B	chr29:44326468-44327467	0.00533744	4.01723	0	2	2	0	0	0	0	RAB1B, member RAS oncogene family [Source:VGNC Symbol;Acc:VGNC:56276]
	protein_coding	chr13:38404260-38405259	0.0111112	3.9637	1	1	1	0	0	2	0
	cpg	chr25:41424770-41425769	0.0233065	3.96172	0	0	0	0	0	1	0
ENSBTAG00000008421	SCRIB	14:1005039-1006039	1.12537e-10	3.95532	0	1	0	0	0	0	0	scribble planar cell polarity protein [Source:VGNC Symbol;Acc:VGNC:34365]
	firstef	chr25:22655629-22656628	0.0424242	3.95108	0	0	0	0	0	1	0
	cpg	chr6:18008001-18009000	0.00752656	3.94991	0	0	0	0	0	1	0
	cpg	chr6:10360001-10361000	0.00389992	3.90646	0	0	0	0	0	1	0
	protein_coding	chr8:73357273-73358272	0.000699959	3.88109	0	2	1	0	0	5	0
	cpg	chr4:27728001-27729000	0.0153414	3.85983	0	0	0	0	0	1	0
	cpg	chr15:82598001-82599000	0.0119957	3.85508	0	0	0	0	0	1	0
ENSBTAG00000050380	KCTD1	24:30369286-30370286	5.12048e-07	3.8522	0	1	0	0	0	1	0	potassium channel tetramerization domain containing 1 [Source:NCBI gene;Acc:784587]
	cpg	chr27:43439625-43440624	0.0117444	3.82248	0	0	0	0	0	1	0
ENSBTAG00000015194	CBLN1	chr18:17740588-17741587	1.53453e-07	3.7974	0	0	1	0	0	14	0	cerebellin 1 precursor [Source:VGNC Symbol;Acc:VGNC:26811]
	cpg	chr17:9730001-9731000	7.16396e-05	3.77971	0	0	0	0	0	1	0
ENSBTAG00000030257	SH3BP1	chr5:109489401-109490400	0.0326617	3.75099	0	4	4	0	0	0	0	SH3 domain binding protein 1 [Source:VGNC Symbol;Acc:VGNC:34565]
	trnascan	chr19:56358996-56359995	0.00089741	3.73206	0	0	0	0	0	1	0
ENSBTAG00000000189	LHFPL3	4:46111708-46112708	0.000780896	3.71071	0	1	0	0	0	1	0	LHFPL tetraspan subfamily member 3 [Source:VGNC Symbol;Acc:VGNC:30866]
	cpg	chr8:24914001-24915000	3.41221e-06	3.68894	0	0	0	0	0	1	0
	firstef-cpg	chr22:13439054-13440053	0.000631259	3.67661	0	0	0	0	0	2	0
	cpg	chr9:54742001-54743000	2.32708e-05	3.67424	0	0	0	0	0	1	0
	cpg	chr8:35871001-35872000	7.32539e-07	3.66775	0	0	0	0	0	1	0
	eponine	chr4:41491001-41492000	5.15849e-25	3.66043	0	0	0	0	0	1	0
ENSBTAG00000005765	SYNGR1	chr5:110784333-110785332	0.00705842	3.62413	0	1	0	0	0	0	0	synaptogyrin 1 [Source:VGNC Symbol;Acc:VGNC:35524]
	5_8S_rRNA-rRNA_gene224-ENSBTAE00000480663	chr27:6222451-6222962	8.38626e-11	3.54425	0	0	1	0	2	11	0
	cpg	chrX:4043611-4044610	5.95906e-05	3.51012	0	0	0	0	0	1	0
ENSBTAG00000018808	SLC25A35	chr19:27908191-27909190	3.33276e-07	3.48981	2	2	2	0	0	1	0	solute carrier family 25 member 35 [Source:VGNC Symbol;Acc:VGNC:34761]
	cpg	chr10:59500001-59501000	0.0274762	3.48334	0	0	0	0	0	1	0
	ASPHD1-SEZ6L2	chr25:26359884-26360030	3.52158e-05	3.47144	0	0	1	0	0	5	0
ENSBTAG00000004398	IMMP2L	4:57292100-57293100	0.000389319	3.46532	0	1	0	0	0	0	0	inner mitochondrial membrane peptidase subunit 2 [Source:VGNC Symbol;Acc:VGNC:57350]
	cpg	chr19:12916-12999	4.36169e-05	3.46447	0	0	0	0	0	1	0
ENSBTAG00000015226	BRSK1	chr18:62190298-62191101	0.000246042	3.46082	0	1	1	0	0	2	0	BR serine/threonine kinase 1 [Source:VGNC Symbol;Acc:VGNC:50055]
	cpg-firstef	chr19:43239262-43240261	0.0252592	3.44953	0	0	0	0	0	3	0
	cpg-firstef	chrX:22597570-22598160	0.00272852	3.44827	0	0	0	0	0	3	0
	cpg	chr8:56731001-56732000	0.00140367	3.41176	0	0	0	0	0	1	0
	cpg-firstef	chrX:78879667-78879817	0.0116169	3.40233	0	0	0	0	0	2	0
	cpg	chr4:27729001-27730000	0.0268988	3.38506	0	0	0	0	0	1	0
ENSBTAG00000013958	PAK4	chr18:48893866-48894464	0.0460913	3.36264	0	3	3	0	0	2	0	p21 (RAC1) activated kinase 4 [Source:NCBI gene;Acc:539742]
ENSBTAG00000052139	DNAH3	25:18951636-18952636	0.00600541	3.36028	0	1	0	0	0	1	0	dynein axonemal heavy chain 3 [Source:NCBI gene;Acc:786654]
ENSBTAG00000015238	DSC3	chr24:26084504-26085503	0.0470301	3.35966	0	3	0	0	0	1	0	desmocollin 3 [Source:VGNC Symbol;Acc:VGNC:28214]
ENSBTAG00000024888	PDE5A	6:5746910-5747910	7.43631e-06	3.30227	0	1	0	0	0	1	0	phosphodiesterase 5A [Source:VGNC Symbol;Acc:VGNC:32678]
	eponine	chr16:66307001-66308000	2.23179e-06	3.2873	0	0	0	0	0	1	0
	cpg	chr25:30348001-30349000	0.00404102	3.27775	0	0	0	0	0	1	0
	cpg	chr28:39277001-39278000	0.00217389	3.27491	0	0	0	0	0	1	0
	firstef	chr22:35789060-35790059	0.00127616	3.26396	0	0	0	0	0	1	0
ENSBTAG00000012695	LCK	chr2:121268706-121269705	0.00632862	3.25891	0	3	4	0	0	6	0	LCK proto-oncogene, Src family tyrosine kinase [Source:VGNC Symbol;Acc:VGNC:30810]
	cpg	chrX:123929001-123930000	0.0117343	3.25259	0	0	0	0	0	1	0
ENSBTAG00000006392	TTC7B	chr10:102195316-102196315	0.0216279	3.2492	0	3	0	0	0	3	0	tetratricopeptide repeat domain 7B [Source:VGNC Symbol;Acc:VGNC:36481]
	cpg-firstef	chr9:98739786-98740164	0.000296329	3.24802	0	0	0	0	0	2	0
ENSBTAG00000017368	YBX1	3:103523502-103524502	1.14369e-13	3.24478	0	1	0	0	0	1	0	Y-box binding protein 1 [Source:VGNC Symbol;Acc:VGNC:50233]
	firstef-cpg	chrX:106058718-106059717	0.00512134	3.23361	0	0	0	0	0	4	0
	cpg-eponine-firstef	chr14:494001-495000	2.09317e-10	3.21699	0	0	0	0	0	5	0
	protein_coding	chr3:108149681-108150680	0.000991046	3.19048	0	1	1	0	0	2	0
ENSBTAG00000003938	FNDC1	9:95516972-95517972	4.45474e-06	3.17627	0	1	0	0	0	1	0	fibronectin type III domain containing 1 [Source:VGNC Symbol;Acc:VGNC:58376]
	cpg	chr7:71921001-71922000	0.0498643	3.17189	0	0	0	0	0	1	0
	cpg	chr3:82797001-82798000	1.30579e-08	3.1687	0	0	0	0	0	1	0
ENSBTAG00000030646	KCTD17	chr5:75487606-75488605	0.00970002	3.16542	0	4	2	0	0	2	0	potassium channel tetramerization domain containing 17 [Source:VGNC Symbol;Acc:VGNC:30506]
	protein_coding	chr3:103458140-103459139	0.0226953	3.14739	0	1	0	0	0	2	0
	firstef-cpg	chr4:68943076-68944075	1.45749e-05	3.14255	0	0	0	0	0	3	0
	cpg-firstef	chr6:56608467-56609466	0.000666915	3.12429	0	0	0	0	0	3	0
	cpg	chr4:11301001-11302000	6.83573e-06	3.11071	0	0	0	0	0	1	0
ENSBTAG00000014691	ARFGEF1	chr14:31388983-31389010	3.36411e-34	3.09477	0	1	0	0	0	1	0	ADP ribosylation factor guanine nucleotide exchange factor 1 [Source:VGNC Symbol;Acc:VGNC:26064]
	5S_rRNA-rRNA_gene72-ENSBTAE00000443631	chr14:491001-492000	9.43756e-91	3.0877	0	0	1	0	2	3	0
	cpg	chr8:36124001-36125000	0.000283742	3.0501	0	0	0	0	0	1	0
ENSBTAG00000025297	MMGT1	chrX:19592527-19593188	0.000506097	3.04695	1	0	1	0	0	4	0	membrane magnesium transporter 1 [Source:VGNC Symbol;Acc:VGNC:31516]
	cpg	chr17:9731001-9732000	0.0112155	3.03976	0	0	0	0	0	1	0
	cpg	chr25:30306001-30307000	0.000979735	3.03724	0	0	0	0	0	1	0
	cpg	chr4:66525001-66526000	3.68719e-16	3.03386	0	0	0	0	0	1	0
	cpg	chr8:110680001-110681000	1.29947e-07	3.02519	0	0	0	0	0	1	0
ENSBTAG00000005230	SHOX2	chr1:109418038-109419037	7.83263e-05	3.02399	0	1	1	0	0	6	0	short stature homeobox 2 [Source:VGNC Symbol;Acc:VGNC:34606]
ENSBTAG00000001528	CDK13	4:80972273-80973273	4.56344e-42	3.01771	0	1	0	0	0	1	0	cyclin dependent kinase 13 [Source:VGNC Symbol;Acc:VGNC:27118]
	eponine	chr3:1039001-1040000	1.17405e-05	3.01705	0	0	0	0	0	1	0
	firstef	chrX:52853558-52854557	0.00477735	3.00113	0	0	0	0	0	2	0
	cpg	chr16:63164001-63165000	5.61232e-10	2.9991	0	0	0	0	0	1	0
ENSBTAG00000008452	IHH	chr2:107004398-107004492	0.0292542	2.9752	0	1	1	0	0	1	0	Indian hedgehog signaling molecule [Source:VGNC Symbol;Acc:VGNC:30099]
ENSBTAG00000053199	CNIH3	chr16:27738285-27739284	0.000156962	2.94653	0	1	1	0	0	4	0	cornichon family AMPA receptor auxiliary protein 3 [Source:NCBI gene;Acc:615236]
	cpg	chr6:10357001-10358000	0.000167454	2.93861	0	0	0	0	0	1	0
ENSBTAG00000033721	RLBP1	chr21:20839027-20840026	0.0040815	2.91776	0	1	1	0	2	4	0	retinaldehyde binding protein 1 [Source:VGNC Symbol;Acc:VGNC:33989]
ENSBTAG00000033721	RLBP1	chr21:20839027-20840026	0.0040815	2.91776	0	1	1	0	2	4	0	retinaldehyde binding protein 1 [Source:VGNC Symbol;Acc:VGNC:33989]
ENSBTAG00000019332	SLC9C1	1:57049486-57050486	0.0024681	2.9108	0	1	0	0	0	1	0	solute carrier family 9 member C1 [Source:VGNC Symbol;Acc:VGNC:53607]
	eponine	chr29:19432001-19433000	1.27183e-11	2.90319	0	0	0	0	0	1	0
	protein_coding	chr20:23806001-23807000	0.00228877	2.89465	0	2	0	0	0	1	0
	eponine	chr29:19405001-19406000	0.00255088	2.89163	0	0	0	0	0	1	0
	cpg	chr3:8105001-8106000	1.56546e-25	2.84399	0	0	0	0	0	1	0
	firstef-cpg-eponine	chr2:70620342-70621341	8.388e-05	2.8096	0	0	0	0	0	4	0
	5S_rRNA-rRNA_gene59-ENSBTAE00000474988	chr14:208001-209000	0.000143791	2.80768	0	0	1	0	2	1	0
	cpg	chr4:35244001-35245000	0.00290381	2.78102	0	0	0	0	0	1	0
ENSBTAG00000018785	TUBB1	chr13:57365507-57366506	0.0177163	2.7788	0	0	1	0	0	3	0	tubulin beta 1 class VI [Source:VGNC Symbol;Acc:VGNC:36506]
ENSBTAG00000002060	RPL19	19:39694666-39695666	2.64829e-11	2.77006	0	0	0	0	0	1	1	ribosomal protein L19 [Source:VGNC Symbol;Acc:VGNC:49956]
	cpg	chr8:56735001-56736000	9.38956e-08	2.76547	0	0	0	0	0	1	0
ENSBTAG00000002997	ADAMTSL1	chr8:25738305-25738983	0.003221	2.74714	0	1	0	0	0	0	0	ADAMTS like 1 [Source:VGNC Symbol;Acc:VGNC:58359]
	cpg	chr8:24896001-24897000	0.00965579	2.72315	0	0	0	0	0	1	0
ENSBTAG00000000244	NRXN2	chr29:42896773-42897772	0.0198357	2.71964	0	3	2	0	0	0	0	neurexin 2 [Source:VGNC Symbol;Acc:VGNC:32271]
ENSBTAG00000005072	CUBN	13:31380427-31381427	1.2919e-24	2.71304	0	1	0	0	0	1	0	cubilin [Source:VGNC Symbol;Acc:VGNC:27828]
	cpg	chr1:5254001-5255000	1.20175e-05	2.69344	0	0	0	0	0	1	0
	cpg	chr20:72037001-72038000	4.81449e-12	2.69194	0	0	0	0	0	1	0
	trnascan	chr7:13129093-13130092	0.0201292	2.69002	0	0	0	0	0	5	0
	cpg-eponine	chr21:66495933-66496511	0.0283728	2.68653	0	0	0	0	0	3	0
ENSBTAG00000015238	DSC3	chr24:26083504-26084503	0.0129966	2.68033	0	5	5	0	0	6	0	desmocollin 3 [Source:VGNC Symbol;Acc:VGNC:28214]
	cpg	chr8:74486001-74487000	0.00268224	2.67549	0	0	0	0	0	1	0
	cpg	chr27:28725001-28726000	0.00316596	2.65191	0	0	0	0	0	1	0
	cpg	chr9:45070001-45071000	0.0193399	2.64657	0	0	0	0	0	1	0
ENSBTAG00000020426	TFAP2B	chr23:23375992-23376991	2.35672e-05	2.64302	0	1	0	0	0	6	0	transcription factor AP-2 beta [Source:VGNC Symbol;Acc:VGNC:35777]
	cpg	chr8:75857001-75858000	0.0226731	2.63976	0	0	0	0	0	1	0
ENSBTAG00000015848	PHKA1	X:77951087-77952087	2.11184e-96	2.63122	0	1	0	0	0	1	0	phosphorylase kinase regulatory subunit alpha 1 [Source:VGNC Symbol;Acc:VGNC:32830]
	cpg	chr1:5282001-5283000	2.44316e-05	2.63019	0	0	0	0	0	1	0
	cpg	chr18:11456001-11457000	3.18609e-05	2.61399	0	0	0	0	0	1	0
	cpg	chr6:17997001-17998000	0.000476378	2.59803	0	0	0	0	0	1	0
	cpg	chr27:37637001-37638000	0.000484576	2.59192	0	0	0	0	0	1	0
	cpg	chr3:64416001-64417000	2.92238e-07	2.56668	0	0	0	0	0	1	0
	cpg	chr19:18127-18189	0.000345291	2.55599	0	0	0	0	0	1	0
	cpg	chr7:89225001-89226000	0.0014242	2.55433	0	0	0	0	0	1	0
	cpg	chr11:80512001-80513000	4.98765e-05	2.52827	0	0	0	0	0	1	0
	cpg	chrX:14213507-14214118	2.40592e-05	2.52649	0	0	0	0	0	1	0
ENSBTAG00000018227	SLC4A7	chr7:121031-122030	0.0037179	2.52425	0	1	0	0	0	0	0	solute carrier family 4 member 7 [Source:VGNC Symbol;Acc:VGNC:34896]
	protein_coding	chr3:12137088-12138087	0.000703253	2.52022	0	1	2	0	0	1	0
	cpg	chr7:41483001-41484000	3.94128e-05	2.51603	0	0	0	0	0	1	0
	cpg	chr23:52341001-52342000	0.0343831	2.51567	0	0	0	0	0	1	0
ENSBTAG00000017245	COPG2	4:94434333-94435333	2.0687e-06	2.50914	0	1	0	0	0	0	0	coatomer protein complex subunit gamma 2 [Source:VGNC Symbol;Acc:VGNC:27597]
	cpg	chr7:12091001-12092000	1.20321e-05	2.48626	0	0	0	0	0	1	0
	cpg	chr11:65323001-65324000	9.55261e-07	2.47575	0	0	0	0	0	1	0
	cpg	chr22:53678001-53679000	3.09943e-05	2.46807	0	0	0	0	0	1	0
ENSBTAG00000024888	PDE5A	6:5796134-5797134	0.00327706	2.45108	0	1	0	0	0	1	0	phosphodiesterase 5A [Source:VGNC Symbol;Acc:VGNC:32678]
	cpg-firstef	chr1:79193778-79194777	8.72762e-09	2.41639	0	0	0	0	0	3	0
	cpg	chr3:82829001-82830000	0.00227569	2.40896	0	0	0	0	0	1	0
	cpg	chr1:5256001-5257000	0.0127689	2.3977	0	0	0	0	0	1	0
	cpg	chr4:35246001-35247000	0.0135922	2.39728	0	0	0	0	0	1	0
	cpg	chr19:14016-14335	0.0177216	2.37761	0	0	0	0	0	1	0
ENSBTAG00000015848	PHKA1	X:78078728-78079728	6.69398e-06	2.37715	0	1	0	0	0	1	0	phosphorylase kinase regulatory subunit alpha 1 [Source:VGNC Symbol;Acc:VGNC:32830]
	trnascan	chr19:13174533-13175532	0.00763927	2.37043	0	0	0	0	0	3	0
	protein_coding	chr25:3407883-3408882	2.49208e-07	2.35814	0	4	4	0	0	3	0
ENSBTAG00000015773	LRGUK	4:97804989-97805989	0.0248676	2.34683	0	1	0	0	0	1	0	leucine rich repeats and guanylate kinase domain containing [Source:VGNC Symbol;Acc:VGNC:52794]
	cpg	chr26:40467001-40468000	0.0294182	2.34389	0	0	0	0	0	1	0
	cpg	chr19:19936-20329	0.000153578	2.34213	0	0	0	0	0	1	0
	cpg	chr24:36378001-36379000	3.19322e-07	2.33727	0	0	0	0	0	1	0
	cpg	chr24:35625001-35626000	0.00027876	2.3296	0	0	0	0	0	1	0
ENSBTAG00000050112	SCRT1	chr14:597475-598474	0.0085465	2.32052	0	0	1	0	0	9	0	scratch family transcriptional repressor 1 [Source:NCBI gene;Acc:618261]
	cpg	chr3:82747001-82748000	0.00190731	2.3071	0	0	0	0	0	1	0
	cpg	chr6:18004001-18005000	0.00192099	2.29449	0	0	0	0	0	1	0
ENSBTAG00000010223	NTF3	chr5:104822507-104823506	0.00265185	2.29245	1	1	1	0	0	6	0	neurotrophin 3 [Source:VGNC Symbol;Acc:VGNC:32299]
	cpg	chr8:89609275-89609329	0.0150086	2.27827	0	0	0	0	0	1	0
	cpg	chr19:7158-7285	0.00314505	2.277	0	0	0	0	0	1	0
	cpg	chr27:37617001-37618000	0.000938948	2.2606	0	0	0	0	0	1	0
ENSBTAG00000014182	CTNNA1	7:50211710-50212710	0.0102947	2.25761	0	1	0	0	0	1	0	catenin alpha 1 [Source:VGNC Symbol;Acc:VGNC:27799]
	cpg-firstef-eponine	chr2:24453562-24453587	0.00680785	2.20653	0	0	0	0	0	3	0
	ARL6IP4-OGFOD2	chr17:52554964-52555963	0.00032236	2.1997	0	3	3	0	0	2	0
	protein_coding	chr22:2882001-2883000	3.00905e-07	2.18467	0	1	0	0	0	1	0
	cpg	chr4:66548001-66549000	0.00347759	2.18325	0	0	0	0	0	1	0
	firstef	chr1:88511202-88511915	0.00317923	2.16574	0	0	0	0	0	1	0
	cpg	chr8:110760001-110761000	0.00188509	2.158	0	0	0	0	0	1	0
	cpg	chr16:63247001-63248000	0.000532547	2.15518	0	0	0	0	0	1	0
	cpg-firstef	chr9:23642053-23642124	0.00674592	2.15297	0	0	0	0	0	3	0
	cpg	chr20:48549001-48550000	0.0123961	2.15272	0	0	0	0	0	1	0
	cpg	chr15:13064632-13064642	0.00172062	2.15064	0	0	0	0	0	1	0
ENSBTAG00000019332	SLC9C1	1:57030672-57031672	1.18812e-05	2.14571	0	1	0	0	0	1	0	solute carrier family 9 member C1 [Source:VGNC Symbol;Acc:VGNC:53607]
	eponine	chr23:20008790-20009229	1.21511e-06	2.14116	0	0	0	0	0	1	0
	cpg-firstef-eponine	chrX:10840495-10840803	1.32488e-08	2.14042	0	0	0	0	0	7	0
	cpg	chr16:63165001-63166000	0.0076959	2.13334	0	0	0	0	0	1	0
ENSBTAG00000052139	DNAH3	25:18951496-18952496	0.000141404	2.13293	0	1	0	0	0	1	0	dynein axonemal heavy chain 3 [Source:NCBI gene;Acc:786654]
ENSBTAG00000003418	MSN	X:94709149-94710149	0.00490947	2.1294	0	1	0	0	0	1	0	moesin [Source:VGNC Symbol;Acc:VGNC:31703]
	cpg	chr8:110674001-110675000	5.17986e-14	2.11744	0	0	0	0	0	1	0
	SSTR1	chr21:48350239-48351238	0.00335468	2.11701	0	0	1	0	0	4	0
	cpg	chr22:42397001-42398000	0.000122046	2.10935	0	0	0	0	0	1	0
	cpg	chr7:74641001-74642000	1.13589e-12	2.10646	0	0	0	0	0	1	0
ENSBTAG00000052139	DNAH3	25:18949689-18950689	0.0497946	2.09989	0	1	0	0	0	1	0	dynein axonemal heavy chain 3 [Source:NCBI gene;Acc:786654]
	cpg-eponine	chr6:99312741-99313740	0.000625195	2.09878	0	0	0	0	0	2	0
	cpg	chr10:68741001-68742000	1.22625e-07	2.09849	0	0	0	0	0	1	0
	cpg	chr27:10381001-10382000	0.0111834	2.08831	0	0	0	0	0	1	0
	protein_coding	chr22:2890001-2891000	3.41745e-05	2.07147	0	1	0	0	0	1	0
ENSBTAG00000025424	NOTCH4	chr23:27186936-27187324	0.00304228	2.06437	0	1	0	0	0	0	0	notch receptor 4 [Source:VGNC Symbol;Acc:VGNC:32179]
	RALGPS1-ANGPTL2	chr11:97835784-97836783	0.0219003	2.06141	0	1	1	1	0	1	0
	RALGPS1-ANGPTL2	chr11:97835784-97836783	0.0219003	2.06141	0	1	1	1	0	1	0
	cpg	chr27:37615001-37616000	0.0378597	2.06007	0	0	0	0	0	1	0
	cpg-firstef-eponine	chr29:32611491-32612490	0.000998954	2.04096	0	0	0	0	0	9	0
	cpg-firstef-eponine	chr6:14835423-14836422	0.00239796	2.02793	0	0	0	0	0	4	0
	cpg	chr8:99200001-99201000	6.10634e-67	2.0044	0	0	0	0	0	1	0
ENSBTAG00000009384	AGTRAP	chr16:41946905-41947904	9.1735e-05	2.00409	1	1	1	0	0	2	0	angiotensin II receptor associated protein [Source:VGNC Symbol;Acc:VGNC:25747]
	cpg	chr15:26573001-26574000	0.0274258	1.98663	0	0	0	0	0	1	0
	cpg	chr14:4917001-4918000	9.93639e-06	1.97679	0	0	0	0	0	1	0
	cpg	chr18:30854001-30855000	6.19729e-06	1.97242	0	0	0	0	0	1	0
	cpg	chr27:10379001-10380000	0.0212411	1.9719	0	0	0	0	0	1	0
	cpg	chr8:56756001-56757000	0.000384153	1.96957	0	0	0	0	0	1	0
	protein_coding	chr22:2878001-2879000	0.00146136	1.96354	0	1	0	0	0	1	0
ENSBTAG00000052139	DNAH3	25:18956069-18957069	0.0171408	1.95858	0	1	0	0	0	1	0	dynein axonemal heavy chain 3 [Source:NCBI gene;Acc:786654]
ENSBTAG00000047894	SLC32A1	chr13:67534930-67535929	0.0257274	1.9576	1	1	1	0	0	4	1	solute carrier family 32 member 1 [Source:VGNC Symbol;Acc:VGNC:34815]
	cpg	chrX:147190001-147191000	0.0128813	1.9545	0	0	0	0	0	1	0
ENSBTAG00000010395	DOCK9	chr12:75860989-75861191	0.000870979	1.94417	0	1	0	0	0	1	0	dedicator of cytokinesis 9 [Source:VGNC Symbol;Acc:VGNC:28163]
	cpg	chr26:40470001-40471000	0.000137726	1.94205	0	0	0	0	0	1	0
	eponine	chr3:1041001-1042000	0.00539721	1.92883	0	0	0	0	0	1	0
	cpg	chr1:144089001-144090000	1.62482e-05	1.91735	0	0	0	0	0	1	0
	cpg	chr16:63175001-63176000	0.0010412	1.91646	0	0	0	0	0	1	0
	cpg	chr11:107291001-107292000	3.31414e-08	1.90303	0	0	0	0	0	1	0
	cpg-eponine	chr15:61371396-61372395	0.0108346	1.88038	0	0	0	0	0	3	0
	cpg	chr25:30294001-30295000	6.19332e-05	1.87051	0	0	0	0	0	1	0
	cpg	chr28:43073001-43074000	0.00175548	1.86985	0	0	0	0	0	1	0
	protein_coding	chr18:63909545-63910544	0.0211466	1.86275	0	1	1	0	0	4	0
	5S_rRNA-rRNA_gene60-ENSBTAE00000447290	chr14:214001-215000	4.52066e-05	1.86262	0	0	1	0	2	2	0
	cpg	chrX:146305001-146306000	0.000291745	1.8488	0	0	0	0	0	1	0
	cpg-firstef-eponine	chr22:11308017-11309016	0.00776898	1.84093	0	0	0	0	0	8	0
	cpg	chr8:24912001-24913000	6.23985e-06	1.83806	0	0	0	0	0	1	0
	cpg-firstef-eponine	chr5:47965773-47966772	0.0215916	1.83405	0	0	0	0	0	6	0
	cpg	chr6:27313001-27314000	0.00238717	1.82551	0	0	0	0	0	1	0
	cpg	chr3:82904001-82905000	9.02868e-06	1.82536	0	0	0	0	0	1	0
ENSBTAG00000021789	ZNF574	chr18:51182311-51182900	0.0295842	1.82535	0	0	1	0	0	0	0	zinc finger protein 574 [Source:VGNC Symbol;Acc:VGNC:50117]
ENSBTAG00000052139	DNAH3	25:18961053-18962053	0.0246996	1.82372	0	1	0	0	0	1	0	dynein axonemal heavy chain 3 [Source:NCBI gene;Acc:786654]
ENSBTAG00000015848	PHKA1	X:78088865-78089865	0.000796248	1.82225	0	1	0	0	0	1	0	phosphorylase kinase regulatory subunit alpha 1 [Source:VGNC Symbol;Acc:VGNC:32830]
	eponine	chr1:11273001-11274000	0.000274597	1.81028	0	0	0	0	0	2	0
ENSBTAG00000016407	IRX6	chr18:23605458-23606457	0.0155795	1.81015	1	0	1	0	0	9	1	iroquois homeobox 6 [Source:VGNC Symbol;Acc:VGNC:30290]
	cpg	chr8:110703001-110704000	1.03239e-10	1.81009	0	0	0	0	0	1	0
ENSBTAG00000047635	MRO	chr24:50323432-50323812	0.0258765	1.80546	0	1	0	0	0	1	0	maestro [Source:VGNC Symbol;Acc:VGNC:31608]
	cpg	chr9:45028001-45029000	2.86592e-05	1.80275	0	0	0	0	0	1	0
	firstef	chr10:21401147-21402146	0.00647825	1.77341	0	0	0	0	0	1	0
ENSBTAG00000052139	DNAH3	25:18967514-18968514	0.000782839	1.77327	0	1	0	0	0	1	0	dynein axonemal heavy chain 3 [Source:NCBI gene;Acc:786654]
	cpg	chr20:14756001-14757000	0.0340262	1.76731	0	0	0	0	0	1	0
	cpg	chr25:30369001-30370000	1.42412e-13	1.76488	0	0	0	0	0	1	0
	cpg	chr21:2126001-2127000	0.000950898	1.76319	0	0	0	0	0	1	0
	cpg	chr27:37600001-37601000	0.000181208	1.75884	0	0	0	0	0	1	0
ENSBTAG00000024957	SNCA	chr6:34852895-34853894	0.00115628	1.74642	1	1	1	0	0	8	1	synuclein alpha [Source:VGNC Symbol;Acc:VGNC:35059]
ENSBTAG00000020196	ENPP3	9:69643825-69644825	0.000313483	1.73351	0	1	0	0	0	1	0	ectonucleotide pyrophosphatase/phosphodiesterase 3 [Source:VGNC Symbol;Acc:VGNC:28506]
ENSBTAG00000000265	SYNPR	22:37992025-37993025	0.0416398	1.72185	0	1	0	0	0	1	0	synaptoporin [Source:VGNC Symbol;Acc:VGNC:35532]
	cpg	chr9:53577001-53578000	0.00205414	1.72156	0	0	0	0	0	1	0
	ZIC4	chr1:120912419-120913418	0.0158366	1.7178	0	1	0	0	0	6	0
ENSBTAG00000002580	MYH14	chr18:56489084-56490056	0.0283826	1.70995	0	2	2	1	0	3	1	myosin heavy chain 14 [Source:VGNC Symbol;Acc:VGNC:31796]
	cpg	chr6:17996001-17997000	0.000376805	1.70863	0	0	0	0	0	1	0
ENSBTAG00000052139	DNAH3	25:18958305-18959305	0.0108664	1.70476	0	1	0	0	0	1	0	dynein axonemal heavy chain 3 [Source:NCBI gene;Acc:786654]
	cpg	chr21:56323001-56324000	0.0448448	1.70437	0	0	0	0	0	1	0
	firstef	chr2:135931675-135932674	0.0382669	1.69457	0	0	0	0	0	1	0
	cpg	chr3:82801001-82802000	0.0306157	1.69232	0	0	0	0	0	1	0
ENSBTAG00000024888	PDE5A	6:5865970-5866970	0.0119308	1.69183	0	1	0	0	0	1	0	phosphodiesterase 5A [Source:VGNC Symbol;Acc:VGNC:32678]
	cpg	chr19:61936001-61937000	0.00558432	1.68871	0	0	0	0	0	1	0
ENSBTAG00000052139	DNAH3	chr25:18954860-18955132	0.000253214	1.68416	0	2	0	0	0	1	0	dynein axonemal heavy chain 3 [Source:NCBI gene;Acc:786654]
	cpg	chr7:12114001-12115000	0.00844271	1.67277	0	0	0	0	0	1	0
	cpg	chr8:36146001-36147000	0.00637509	1.66851	0	0	0	0	0	1	0
ENSBTAG00000030749	DNAJC6	chr3:80044305-80044484	0.00481383	1.65926	1	1	1	0	0	2	0	DnaJ heat shock protein family (Hsp40) member C6 [Source:VGNC Symbol;Acc:VGNC:55167]
	cpg	chr19:15869-15918	0.00160761	1.65627	0	0	0	0	0	1	0
	cpg	chr28:39356001-39357000	0.0234694	1.65498	0	0	0	0	0	1	0
	cpg	chr28:41087638-41088637	0.0165776	1.65496	0	0	0	0	0	1	0
	cpg-firstef-eponine	chr3:50944734-50944960	0.0201068	1.65343	0	0	0	0	0	4	0
	eponine	chr3:1035001-1036000	0.003923	1.65144	0	0	0	0	0	2	0
	cpg	chr21:26063001-26064000	2.42876e-05	1.65139	0	0	0	0	0	1	0
	cpg	chr19:57001-58000	0.00320514	1.64995	0	0	0	0	0	1	0
	cpg	chr7:12111001-12112000	0.0477214	1.64291	0	0	0	0	0	1	0
	cpg	chr8:110759001-110760000	1.76549e-08	1.64119	0	0	0	0	0	1	0
	firstef-cpg	chr25:32364001-32365000	0.0288122	1.6375	0	0	0	0	0	3	0
ENSBTAG00000021515	ZDHHC19	chr1:70798671-70799670	0.00225477	1.63326	0	2	1	0	0	3	0	zinc finger DHHC-type containing 19 [Source:VGNC Symbol;Acc:VGNC:37134]
	protein_coding	chr7:19632444-19633331	0.00508754	1.63253	0	4	3	0	0	5	0
	cpg	chr3:64409001-64410000	0.0193512	1.62266	0	0	0	0	0	1	0
	cpg	chr7:12115001-12116000	2.29705e-06	1.61939	0	0	0	0	0	1	0
	cpg-firstef-eponine	chr11:100946049-100947048	0.0216414	1.61504	0	0	0	0	0	10	0
	cpg	chr2:100639001-100640000	0.0121558	1.61453	0	0	0	0	0	1	0
	cpg	chr15:26564001-26565000	0.0108256	1.61252	0	0	0	0	0	1	0
	firstef-cpg-eponine	chr14:860027-861026	0.00524155	1.60968	0	0	0	0	0	6	0
	cpg	chr19:9576-10484	0.00400518	1.59425	0	0	0	0	0	1	0
	firstef	chr18:46856388-46857387	0.0155615	1.59259	0	0	0	0	0	1	0
	cpg	chr7:93154001-93155000	3.61546e-05	1.59149	0	0	0	0	0	1	0
ENSBTAG00000019948	AFAP1L1	chr7:60664191-60665190	0.0240663	1.5783	1	1	1	0	0	6	1	actin filament associated protein 1 like 1 [Source:VGNC Symbol;Acc:VGNC:25707]
	firstef	chr28:35744824-35745823	0.00230215	1.5707	0	0	0	0	0	2	0
	cpg	chr8:91984001-91985000	0.0157008	1.57002	0	0	0	0	0	1	0
ENSBTAG00000001250	TFAP2A	chr23:45622760-45623759	0.000950444	1.5632	0	1	0	0	0	4	0	transcription factor AP-2 alpha [Source:VGNC Symbol;Acc:VGNC:35776]
ENSBTAG00000004231	GPM6A	27:7358015-7359015	8.1319e-11	1.54649	0	1	0	0	0	1	0	glycoprotein M6A [Source:NCBI gene;Acc:507389]
	cpg	chrX:134403001-134404000	0.00106384	1.54485	0	0	0	0	0	1	0
	TNFSF13-TNFSF12	chr19:27291133-27291225	0.027479	1.53746	1	0	2	1	0	1	1
	TNFSF13-TNFSF12	chr19:27291133-27291225	0.027479	1.53746	1	0	2	1	0	1	1
	eponine	chr23:19994001-19995000	0.0144803	1.53681	0	0	0	0	0	1	0
	firstef	chr5:103676852-103677851	0.0460709	1.53644	0	0	0	0	0	2	0
ENSBTAG00000044118	HMGA2	chr5:47964773-47965772	8.43178e-05	1.53602	1	1	1	0	0	8	1	high mobility group AT-hook 2 [Source:VGNC Symbol;Acc:VGNC:29875]
ENSBTAG00000018007	NR2F2	chr21:10569272-10569503	0.0187698	1.53366	1	1	1	0	0	9	0	nuclear receptor subfamily 2 group F member 2 [Source:VGNC Symbol;Acc:VGNC:32241]
	cpg	chr16:17760001-17761000	0.000469479	1.52416	0	0	0	0	0	1	0
ENSBTAG00000012659	LRIF1	chr3:32407592-32408591	0.00101096	1.51253	2	2	2	0	0	4	1	ligand dependent nuclear receptor interacting factor 1 [Source:VGNC Symbol;Acc:VGNC:30981]
	cpg	chr6:8895001-8896000	0.0310021	1.5022	0	0	0	0	0	1	0
	cpg-eponine-firstef	chr4:115938625-115939624	0.018398	1.50193	0	0	0	0	0	7	0
	cpg	chr27:35854001-35855000	0.0313433	1.50065	0	0	0	0	0	1	0
	cpg	chr8:78649001-78650000	3.42492e-09	1.49902	0	0	0	0	0	1	0
ENSBTAG00000010437	MKLN1	4:95056307-95057307	0.00265237	1.49387	0	1	0	0	0	1	0	muskelin 1 [Source:VGNC Symbol;Acc:VGNC:31490]
	cpg	chr1:5268001-5269000	0.001805	1.4868	0	0	0	0	0	1	0
	cpg	chr13:83467601-83467615	0.0142532	1.4827	0	0	0	0	0	1	0
	MLLT4	chr9:102377646-102378645	0.0251112	1.47089	0	2	1	0	0	9	0
	cpg	chr24:36386001-36387000	0.00028429	1.46669	0	0	0	0	0	1	0
	cpg-firstef	chr5:73834695-73835694	0.0218149	1.46512	0	0	0	0	0	3	0
	cpg	chr29:31044001-31045000	0.0267695	1.452	0	0	0	0	0	1	0
	cpg-firstef-eponine	chr26:51696328-51696993	0.0132882	1.4486	0	0	0	0	0	6	0
ENSBTAG00000002997	ADAMTSL1	chr8:25820956-25821955	0.023145	1.44835	0	0	1	0	0	0	0	ADAMTS like 1 [Source:VGNC Symbol;Acc:VGNC:58359]
	cpg-firstef	chr10:84403942-84404941	2.68982e-08	1.44815	0	0	0	0	0	4	0
	cpg	chr25:30329001-30330000	8.48421e-15	1.44299	0	0	0	0	0	1	0
	cpg	chr3:64418001-64419000	0.0279497	1.44179	0	0	0	0	0	1	0
	cpg	chr3:64401001-64402000	0.00330264	1.43535	0	0	0	0	0	1	0
ENSBTAG00000021592	WRN	27:27239973-27240973	0.00162227	1.43283	0	1	0	0	0	0	0	WRN RecQ like helicase [Source:VGNC Symbol;Acc:VGNC:59444]
	firstef-cpg	chrX:94816001-94817000	0.0149482	1.43253	0	0	0	0	0	3	0
	cpg	chr11:106047045-106047825	0.035051	1.43018	0	0	0	0	0	1	0
	cpg	chr3:82806001-82807000	0.00149831	1.4271	0	0	0	0	0	1	0
	cpg	chr16:63176001-63177000	0.00645781	1.41377	0	0	0	0	0	1	0
ENSBTAG00000010990	LHX2	chr11:95123790-95124789	0.000279725	1.4135	0	0	0	0	0	7	1	LIM homeobox 2 [Source:VGNC Symbol;Acc:VGNC:30872]
	cpg	chr28:11068001-11069000	0.0248851	1.4128	0	0	0	0	0	1	0
ENSBTAG00000009435	SMG5	chr3:14516860-14517859	0.0361868	1.40948	1	1	1	0	0	3	1	SMG5 nonsense mediated mRNA decay factor [Source:VGNC Symbol;Acc:VGNC:55683]
	cpg	chr7:12137001-12138000	0.0423351	1.40391	0	0	0	0	0	1	0
	trnascan	chr21:44964849-44965848	6.39983e-05	1.38526	0	0	0	0	0	3	0
	cpg	chr16:17764001-17765000	0.00627282	1.38431	0	0	0	0	0	1	0
	cpg	chr1:144079001-144080000	3.3696e-14	1.38321	0	0	0	0	0	1	0
	cpg	chrX:19179001-19180000	0.00458423	1.37399	0	0	0	0	0	1	0
	cpg	chr27:37647001-37648000	0.000471735	1.36791	0	0	0	0	0	1	0
	cpg	chr8:110761001-110762000	0.0107449	1.36755	0	0	0	0	0	1	0
	cpg	chr1:35246134-35246524	0.00575109	1.36011	0	0	0	0	0	1	0
	cpg	chr5:115978001-115979000	0.0395124	1.35671	0	0	0	0	0	1	0
ENSBTAG00000006862	MEIS3	chr18:54396477-54397190	0.045835	1.35502	0	1	1	0	0	0	0	Meis homeobox 3 [Source:VGNC Symbol;Acc:VGNC:52205]
	cpg	chr1:5253001-5254000	0.000140537	1.35419	0	0	0	0	0	1	0
	cpg-firstef-eponine	chr11:24885977-24886976	0.003564	1.35415	0	0	0	0	0	7	0
	cpg	chr8:110731001-110732000	0.0282282	1.35391	0	0	0	0	0	1	0
	cpg	chr7:71935001-71936000	1.76259e-09	1.34267	0	0	0	0	0	1	0
	firstef	chr5:55543080-55544079	0.0397482	1.34148	0	0	0	0	0	2	0
	cpg	chr27:902001-903000	0.00926285	1.33833	0	0	0	0	0	1	0
	cpg	chr11:107290001-107291000	2.52631e-49	1.33775	0	0	0	0	0	1	0
	cpg	chr8:56852001-56853000	0.0129401	1.33635	0	0	0	0	0	1	0
ENSBTAG00000019332	SLC9C1	1:56968099-56969099	0.0299812	1.33445	0	1	0	0	0	1	0	solute carrier family 9 member C1 [Source:VGNC Symbol;Acc:VGNC:53607]
	firstef	chr6:19800001-19801000	1.38447e-40	1.33169	0	0	0	0	0	1	0
	eponine	chr29:19439001-19440000	0.0153564	1.31643	0	0	0	0	0	1	0
ENSBTAG00000022744	TRIM71	chr22:7207833-7208439	0.00556936	1.31307	0	2	3	0	0	18	0	tripartite motif containing 71 [Source:VGNC Symbol;Acc:VGNC:57366]
ENSBTAG00000024888	PDE5A	6:5807283-5808283	0.0104081	1.29788	0	1	0	0	0	1	0	phosphodiesterase 5A [Source:VGNC Symbol;Acc:VGNC:32678]
	cpg-firstef-eponine	chr12:85860499-85860948	0.0424209	1.29727	0	0	0	0	0	4	0
	cpg	chr22:53661001-53662000	0.0438473	1.28889	0	0	0	0	0	1	0
	cpg	chr4:28965001-28966000	0.00439705	1.2866	0	0	0	0	0	1	0
ENSBTAG00000052139	DNAH3	25:18940486-18941486	0.0418794	1.27682	0	1	0	0	0	1	0	dynein axonemal heavy chain 3 [Source:NCBI gene;Acc:786654]
	cpg	chr3:82853001-82854000	0.0160171	1.27557	0	0	0	0	0	1	0
ENSBTAG00000047594	CCNO	chr20:23901977-23902976	0.0107882	1.26676	0	2	2	0	0	5	0	cyclin O [Source:VGNC Symbol;Acc:VGNC:26977]
	cpg	chr7:93155001-93156000	2.69192e-10	1.26042	0	0	0	0	0	1	0
ENSBTAG00000012361	ARHGEF11	3:13882300-13883300	0.0433116	1.2562	0	1	0	0	0	1	0	Rho guanine nucleotide exchange factor 11 [Source:VGNC Symbol;Acc:VGNC:54878]
	cpg	chr24:36389001-36390000	0.0214496	1.25325	0	0	0	0	0	1	0
ENSBTAG00000009803	SNCB	chr7:38090876-38091829	0.0410791	1.25263	0	0	1	1	0	3	1	synuclein beta [Source:VGNC Symbol;Acc:VGNC:35061]
ENSBTAG00000032247	PPP1R11	chr23:28912640-28913639	0.026205	1.25216	1	1	1	0	0	2	0	protein phosphatase 1 regulatory inhibitor subunit 11 [Source:VGNC Symbol;Acc:VGNC:33222]
ENSBTAG00000031001	MEGF8	18:50961390-50962390	0.00121117	1.25101	0	1	0	0	0	1	0	multiple EGF like domains 8 [Source:VGNC Symbol;Acc:VGNC:31376]
	cpg	chr4:11299001-11300000	0.0259411	1.24083	0	0	0	0	0	1	0
	cpg-eponine-firstef	chr5:113293976-113294975	0.0169591	1.23984	0	0	0	0	0	7	0
ENSBTAG00000015773	LRGUK	4:97836195-97837195	0.0121633	1.23507	0	1	0	0	0	1	0	leucine rich repeats and guanylate kinase domain containing [Source:VGNC Symbol;Acc:VGNC:52794]
	cpg	chr28:39338001-39339000	0.0432877	1.23483	0	0	0	0	0	1	0
	cpg	chr6:18003001-18004000	0.008536	1.23369	0	0	0	0	0	1	0
	cpg	chr7:71963001-71964000	0.00700653	1.23267	0	0	0	0	0	1	0
	cpg	chr3:82794001-82795000	0.000883178	1.22886	0	0	0	0	0	1	0
	cpg	chr8:110751001-110752000	0.022791	1.22654	0	0	0	0	0	1	0
	cpg	chr8:56778001-56779000	2.13514e-11	1.22547	0	0	0	0	0	1	0
ENSBTAG00000007592	RARG	chr5:26782476-26783475	0.000408725	1.22305	0	1	0	0	0	1	0	retinoic acid receptor gamma [Source:VGNC Symbol;Acc:VGNC:33730]
	trnascan	chr1:22426695-22426720	0.0171676	1.22137	0	0	0	0	0	2	0
ENSBTAG00000012829	EBI3	chr7:19816753-19817112	0.0233013	1.21961	0	1	0	0	0	1	0	Epstein-Barr virus induced 3 [Source:NCBI gene;Acc:514933]
	cpg	chr19:60001-61000	0.0394233	1.21803	0	0	0	0	0	1	0
	cpg	chr8:110747001-110748000	0.0222113	1.19919	0	0	0	0	0	1	0
	cpg	chr11:50087001-50088000	0.0372773	1.19515	0	0	0	0	0	1	0
ENSBTAG00000019332	SLC9C1	1:56968648-56969648	0.0348084	1.1942	0	1	0	0	0	1	0	solute carrier family 9 member C1 [Source:VGNC Symbol;Acc:VGNC:53607]
	cpg	chr10:68743001-68744000	3.80223e-05	1.19074	0	0	0	0	0	1	0
	protein_coding	chr22:2883001-2884000	0.000781108	1.18873	0	1	0	0	0	1	0
ENSBTAG00000018806	PSRC1	chr3:34125478-34126477	0.00701275	1.18385	2	3	3	0	0	4	1	proline and serine rich coiled-coil 1 [Source:VGNC Symbol;Acc:VGNC:33484]
	cpg-firstef-eponine	chr7:65953375-65954068	2.15884e-06	1.17571	0	0	0	0	0	11	0
	cpg	chr27:37641001-37642000	5.5542e-12	1.17355	0	0	0	0	0	1	0
	cpg	chr6:17968001-17969000	0.0283057	1.16836	0	0	0	0	0	1	0
	PAPD4	chr10:10611859-10612858	0.00999708	1.16779	4	4	4	0	0	3	0
	cpg	chr27:37609001-37610000	0.00162829	1.16575	0	0	0	0	0	1	0
	cpg	chr3:82834001-82835000	1.07547e-05	1.16317	0	0	0	0	0	1	0
ENSBTAG00000005072	CUBN	13:31280712-31281712	0.0251867	1.16267	0	1	0	0	0	1	0	cubilin [Source:VGNC Symbol;Acc:VGNC:27828]
	cpg	chr12:39227001-39228000	0.00454131	1.15716	0	0	0	0	0	1	0
ENSBTAG00000013191	AGRN	chr16:51441441-51442440	0.0203683	1.15526	0	1	0	0	0	4	0	agrin [Source:VGNC Symbol;Acc:VGNC:25742]
	cpg	chr6:45737001-45738000	0.0421981	1.1526	0	0	0	0	0	1	0
	cpg-firstef-eponine	chr1:67361384-67362383	0.037841	1.14262	0	0	0	0	0	8	0
	cpg	chr28:39045584-39046078	0.0127518	1.13809	0	0	0	0	0	1	0
	cpg-firstef	chr14:402001-403000	1.14779e-07	1.13139	0	0	0	0	0	4	0
ENSBTAG00000011717	SAP30BP	chr19:55915275-55916274	0.0482083	1.12636	1	1	1	0	0	3	0	SAP30 binding protein [Source:VGNC Symbol;Acc:VGNC:34283]
ENSBTAG00000015113	CITED4	chr3:105348214-105349213	0.0154126	1.12298	1	0	1	0	0	5	1	Cbp/p300 interacting transactivator with Glu/Asp rich carboxy-terminal domain 4 [Source:VGNC Symbol;Acc:VGNC:27378]
	cpg	chr3:82839001-82840000	0.00238571	1.11311	0	0	0	0	0	1	0
	cpg	chr27:37582001-37583000	0.0215476	1.10459	0	0	0	0	0	1	0
	firstef	chr21:68449813-68450141	5.02468e-08	1.10421	0	0	0	0	0	1	0
	cpg	chr7:12088001-12089000	0.000779365	1.09862	0	0	0	0	0	1	0
ENSBTAG00000009209	BEND5	chr3:97468112-97468775	0.000335874	1.09192	1	1	1	0	0	3	1	BEN domain containing 5 [Source:VGNC Symbol;Acc:VGNC:26468]
	cpg	chr4:35249001-35250000	0.0145563	1.09047	0	0	0	0	0	1	0
	cpg	chr6:45757001-45758000	5.54864e-06	1.09012	0	0	0	0	0	1	0
ENSBTAG00000000265	SYNPR	22:37830514-37831514	0.000107583	1.08813	0	1	0	0	0	1	0	synaptoporin [Source:VGNC Symbol;Acc:VGNC:35532]
ENSBTAG00000045664	LRRC41	chr3:99800229-99801228	0.00213442	1.08813	0	1	0	0	0	1	0	leucine rich repeat containing 41 [Source:NCBI gene;Acc:337889]
	cpg	chr29:6985001-6986000	9.33179e-05	1.08398	0	0	0	0	0	1	0
	cpg	chr19:22521-22928	0.00855269	1.07659	0	0	0	0	0	1	0
	cpg	chr4:28973001-28974000	0.000649748	1.06748	0	0	0	0	0	1	0
	cpg	chr20:66611001-66612000	0.011522	1.06691	0	0	0	0	0	1	0
	protein_coding	chr3:11918949-11919948	0.000174039	1.06564	0	1	1	0	0	2	0
	cpg	chr25:30346001-30347000	0.0386143	1.06517	0	0	0	0	0	1	0
ENSBTAG00000018487	CFAP45	chr3:9783361-9784360	0.0249424	1.06222	1	1	1	0	0	1	1	cilia and flagella associated protein 45 [Source:VGNC Symbol;Acc:VGNC:27244]
	protein_coding	chr7:110046001-110047000	1.48513e-05	1.059	0	1	0	0	0	1	0
ENSBTAG00000005345	ARPC3	chr17:54336538-54337537	0.00166864	1.05733	1	1	1	0	0	3	0	actin related protein 2/3 complex subunit 3 [Source:VGNC Symbol;Acc:VGNC:53890]
	cpg	chr10:68740001-68741000	0.00561228	1.051	0	0	0	0	0	1	0
ENSBTAG00000002997	ADAMTSL1	8:25417807-25418807	0.0233468	1.04853	0	1	0	0	0	1	0	ADAMTS like 1 [Source:VGNC Symbol;Acc:VGNC:58359]
ENSBTAG00000001717	AURKB	chr19:27840119-27840678	0.0039069	1.04713	1	1	1	0	0	1	0	aurora kinase B [Source:VGNC Symbol;Acc:VGNC:26351]
ENSBTAG00000006507	ADAMTS3	6:87525517-87526517	4.06903e-12	1.04664	0	1	0	0	0	1	0	ADAM metallopeptidase with thrombospondin type 1 motif 3 [Source:VGNC Symbol;Acc:VGNC:25626]
	cpg	chr23:28073360-28073496	0.000207385	1.04418	0	0	0	0	0	1	0
	cpg-firstef-eponine	chr7:25483448-25484447	0.00496744	1.0418	0	0	0	0	0	9	0
	cpg	chr22:53638001-53639000	0.0499437	1.0377	0	0	0	0	0	1	0
ENSBTAG00000023787	TOR4A	chr11:106276993-106277992	0.0275604	1.0333	0	0	1	0	0	7	0	torsin family 4 member A [Source:VGNC Symbol;Acc:VGNC:36227]
ENSBTAG00000015773	LRGUK	4:97820232-97821232	0.0330673	1.02945	0	1	0	0	0	1	0	leucine rich repeats and guanylate kinase domain containing [Source:VGNC Symbol;Acc:VGNC:52794]
	cpg	chr18:11453001-11454000	0.00649286	1.02217	0	0	0	0	0	1	0
ENSBTAG00000015773	LRGUK	4:97842964-97843964	0.0448182	1.02149	0	1	0	0	0	1	0	leucine rich repeats and guanylate kinase domain containing [Source:VGNC Symbol;Acc:VGNC:52794]
	cpg-firstef-eponine	chr14:66561711-66562710	0.0303141	1.02106	0	0	0	0	0	5	0
ENSBTAG00000015848	PHKA1	X:78040521-78041521	0.0216777	1.01866	0	1	0	0	0	1	0	phosphorylase kinase regulatory subunit alpha 1 [Source:VGNC Symbol;Acc:VGNC:32830]
	cpg-firstef	chr19:43283705-43283989	0.00117967	1.01039	0	0	0	0	0	2	0
	cpg	chr2:8534001-8535000	0.00885128	1.00704	0	0	0	0	0	1	0
	cpg	chr4:120825001-120826000	0.0106526	1.00533	0	0	0	0	0	1	0
	firstef-cpg-eponine	chr18:1300739-1301041	0.0272593	1.00326	0	0	0	0	0	4	0
	cpg	chr7:93159001-93160000	0.0459636	0.999867	0	0	0	0	0	1	0
ENSBTAG00000017652	NUP50	chr5:115588817-115589816	0.00144467	0.998712	0	1	0	0	0	5	0	nucleoporin 50 [Source:VGNC Symbol;Acc:VGNC:32362]
ENSBTAG00000003256	TOMM34	chr13:73365845-73366844	0.00566433	0.998155	0	1	0	0	0	2	0	translocase of outer mitochondrial membrane 34 [Source:VGNC Symbol;Acc:VGNC:49135]
	cpg	chr16:17765001-17766000	0.0184295	0.989306	0	0	0	0	0	1	0
	cpg	chr10:59528001-59529000	0.0219436	0.984396	0	0	0	0	0	1	0
	cpg	chr11:80484001-80485000	0.0071567	0.981737	0	0	0	0	0	1	0
	eponine	chr3:1020001-1021000	0.00193814	0.981007	0	0	0	0	0	2	0
ENSBTAG00000021969	KLHL29	chr11:75571515-75572514	0.0422702	0.97727	1	1	1	0	0	12	0	kelch like family member 29 [Source:VGNC Symbol;Acc:VGNC:30656]
	cpg	chr8:56816001-56817000	4.3249e-06	0.97689	0	0	0	0	0	1	0
	cpg	chr27:35853001-35854000	1.20599e-17	0.972444	0	0	0	0	0	1	0
	cpg	chr4:28975001-28976000	0.0471375	0.971042	0	0	0	0	0	1	0
ENSBTAG00000052139	DNAH3	25:18949821-18950821	0.00103487	0.970009	0	1	0	0	0	1	0	dynein axonemal heavy chain 3 [Source:NCBI gene;Acc:786654]
	cpg-firstef	chr3:19481036-19482035	0.0380826	0.96355	0	0	0	0	0	4	0
ENSBTAG00000021306	CHRDL2	chr15:54042357-54043356	0.0327617	0.963006	1	0	1	0	0	11	0	chordin like 2 [Source:VGNC Symbol;Acc:VGNC:27317]
	cpg-firstef-eponine	chr25:35573742-35574741	0.01706	0.960787	0	0	0	0	0	8	0
	cpg	chr8:56844001-56845000	0.000141341	0.958004	0	0	0	0	0	1	0
	cpg	chr21:56327001-56328000	0.00106327	0.95699	0	0	0	0	0	1	0
	cpg	chr7:77966211-77966444	0.00104497	0.951355	0	0	0	0	0	1	0
	cpg	chr3:82898001-82899000	0.00610222	0.946411	0	0	0	0	0	1	0
	cpg	chr25:4827001-4828000	5.69733e-08	0.933096	0	0	0	0	0	1	0
	cpg-firstef	chr19:36561194-36562193	0.0218133	0.924632	0	0	0	0	0	2	0
	AGAP3	chr4:114491001-114492000	0.000238744	0.922995	0	1	0	0	0	1	0
ENSBTAG00000006665	ERP29	chr17:62141557-62142556	0.0297877	0.922644	1	1	1	0	0	3	0	endoplasmic reticulum protein 29 [Source:VGNC Symbol;Acc:VGNC:28596]
	cpg	chr8:20176001-20177000	0.0029232	0.917754	0	0	0	0	0	1	0
	cpg	chr6:17990001-17991000	0.00226108	0.917069	0	0	0	0	0	1	0
	cpg	chr2:100648001-100649000	0.0415121	0.916044	0	0	0	0	0	1	0
	cpg	chr21:56322001-56323000	0.0152934	0.913252	0	0	0	0	0	1	0
	cpg	chr22:53634001-53635000	0.00156929	0.908314	0	0	0	0	0	1	0
	cpg	chr3:82749001-82750000	0.0265606	0.905892	0	0	0	0	0	1	0
	cpg	chr1:5262001-5263000	0.00159947	0.904188	0	0	0	0	0	1	0
	5S_rRNA-rRNA_gene310-ENSBTAE00000478609	chr6:8896001-8897000	0.00823639	0.90087	0	0	1	0	2	3	0
ENSBTAG00000000419	PHEX	chrX:121275547-121276404	3.24368e-09	0.893735	0	1	0	0	0	6	0	phosphate regulating endopeptidase homolog X-linked [Source:VGNC Symbol;Acc:VGNC:50571]
	protein_coding	chr1:45735001-45736000	0.0020511	0.892724	0	1	0	0	0	1	0
	cpg	chr25:30328001-30329000	8.90378e-09	0.889477	0	0	0	0	0	1	0
	protein_coding	chr7:110045001-110046000	4.51774e-05	0.884374	0	1	0	0	0	1	0
	cpg	chr27:37643001-37644000	0.0416807	0.879188	0	0	0	0	0	1	0
	cpg-firstef	chr14:404001-405000	0.00328592	0.874232	0	0	0	0	0	5	0
	cpg	chr2:101694024-101694198	0.00262577	0.872771	0	0	0	0	0	1	0
	firstef-cpg-eponine	chr5:77731686-77732685	0.0110971	0.870269	0	0	0	0	0	5	0
ENSBTAG00000015848	PHKA1	X:78060074-78061074	0.0241649	0.861612	0	1	0	0	0	1	0	phosphorylase kinase regulatory subunit alpha 1 [Source:VGNC Symbol;Acc:VGNC:32830]
ENSBTAG00000021392	DCAF11	chr10:21028984-21029983	0.0417649	0.860799	2	2	2	0	0	13	0	DDB1 and CUL4 associated factor 11 [Source:NCBI gene;Acc:539433]
ENSBTAG00000009243	MFSD4B	9:39145519-39146519	2.17253e-21	0.854378	0	1	1	0	2	3	0	major facilitator superfamily domain containing 4B [Source:VGNC Symbol;Acc:VGNC:31439]
ENSBTAG00000009243	MFSD4B	9:39142779-39143779	2.17253e-21	0.854378	0	1	1	0	2	3	0	major facilitator superfamily domain containing 4B [Source:VGNC Symbol;Acc:VGNC:31439]
	cpg	chr6:17991001-17992000	0.00229043	0.847615	0	0	0	0	0	1	0
	cpg	chr1:124948001-124949000	0.00992977	0.845856	0	0	0	0	0	1	0
	eponine	chr3:1019001-1020000	0.000390987	0.843368	0	0	0	0	0	1	0
	cpg	chr4:27746001-27747000	0.0239975	0.842288	0	0	0	0	0	1	0
	firstef-cpg	chr11:107304001-107305000	2.37697e-12	0.834835	0	0	0	0	0	2	0
	cpg	chr3:82745001-82746000	0.00321392	0.82989	0	0	0	0	0	1	0
	cpg	chr6:45746001-45747000	0.00130105	0.807973	0	0	0	0	0	1	0
ENSBTAG00000031439	CDC14A	chr3:42955473-42956472	0.0175276	0.80605	2	2	4	0	0	4	1	cell division cycle 14A [Source:VGNC Symbol;Acc:VGNC:27059]
ENSBTAG00000012777	SRF	chr23:16775173-16776172	2.40177e-05	0.80018	0	1	1	0	0	10	0	serum response factor [Source:VGNC Symbol;Acc:VGNC:35277]
	cpg	chr28:31995001-31996000	3.50709e-06	0.796045	0	0	0	0	0	1	0
	cpg	chr6:17946001-17947000	0.000115236	0.793941	0	0	0	0	0	1	0
	cpg	chr22:53680001-53681000	0.0210117	0.792685	0	0	0	0	0	1	0
	firstef-cpg	chr1:43193696-43194695	0.018856	0.788029	0	0	0	0	0	4	0
ENSBTAG00000016841	ATP10B	chr7:72291875-72292212	0.00280682	0.785047	0	1	0	0	0	1	0	ATPase phospholipid transporting 10B (putative) [Source:HGNC Symbol;Acc:HGNC:13543]
	cpg	chr28:39276001-39277000	0.00334559	0.779573	0	0	0	0	0	1	0
ENSBTAG00000014182	CTNNA1	7:50017348-50018348	0.0133573	0.751493	0	1	0	0	0	1	0	catenin alpha 1 [Source:VGNC Symbol;Acc:VGNC:27799]
	cpg-eponine-firstef	chr15:76342892-76343891	0.0206706	0.750598	0	0	0	0	0	8	0
ENSBTAG00000007424	LIF	chr17:69266019-69266519	0.039237	0.746464	0	1	1	0	0	6	0	LIF interleukin 6 family cytokine [Source:VGNC Symbol;Acc:VGNC:30880]
	cpg	chr1:29761391-29761436	0.0178514	0.739736	0	0	0	0	0	1	0
	cpg	chr9:45065001-45066000	0.0467131	0.733391	0	0	0	0	0	1	0
ENSBTAG00000007065	TRAPPC6A	chr18:52825597-52826596	0.0134763	0.732701	1	1	1	0	0	4	0	trafficking protein particle complex 6A [Source:VGNC Symbol;Acc:VGNC:36292]
	trnascan	chr1:106923960-106924959	0.000224079	0.729759	0	0	0	0	0	4	0
ENSBTAG00000000621	CATSPERG	chr18:48146829-48147631	0.00937579	0.721703	1	1	1	0	0	3	0	cation channel sperm associated auxiliary subunit gamma [Source:VGNC Symbol;Acc:VGNC:26798]
	cpg	chr1:144126001-144127000	0.00292791	0.719089	0	0	0	0	0	1	0
ENSBTAG00000000207	PUDP	X:135679766-135680766	0.000351926	0.710971	0	1	0	0	0	1	0	pseudouridine 5'-phosphatase [Source:VGNC Symbol;Acc:VGNC:33568]
ENSBTAG00000015848	PHKA1	X:78034167-78035167	0.00669698	0.709728	0	1	0	0	0	1	0	phosphorylase kinase regulatory subunit alpha 1 [Source:VGNC Symbol;Acc:VGNC:32830]
ENSBTAG00000007802	BCLAF1	chr9:74287044-74288043	1.47311e-05	0.70395	1	1	1	0	0	4	0	BCL2 associated transcription factor 1 [Source:VGNC Symbol;Acc:VGNC:26451]
	cpg	chr27:26018427-26018522	0.000634236	0.700987	0	0	0	0	0	1	0
ENSBTAG00000007702	RPP38	chr13:29673581-29674580	0.0337467	0.691295	1	0	1	0	0	2	1	ribonuclease P/MRP subunit p38 [Source:VGNC Symbol;Acc:VGNC:34124]
ENSBTAG00000024888	PDE5A	6:5778059-5779059	0.00756213	0.68895	0	1	0	0	0	1	0	phosphodiesterase 5A [Source:VGNC Symbol;Acc:VGNC:32678]
	eponine	chr4:41466001-41467000	0.00786211	0.683255	0	0	0	0	0	1	0
ENSBTAG00000001391	ANKRD42	chr29:12473092-12473590	0.00321903	0.672032	0	0	1	0	0	9	0	ankyrin repeat domain 42 [Source:VGNC Symbol;Acc:VGNC:56256]
	cpg	chrX:19192393-19192401	0.0357224	0.666045	0	0	0	0	0	2	0
ENSBTAG00000002997	ADAMTSL1	8:25699891-25700891	0.000147165	0.662773	0	1	0	0	0	1	0	ADAMTS like 1 [Source:VGNC Symbol;Acc:VGNC:58359]
	cpg	chr1:144087001-144088000	0.0164144	0.657808	0	0	0	0	0	1	0
	cpg-firstef-eponine	chr13:53024443-53025442	0.0362046	0.653628	0	0	0	0	0	8	0
	firstef-cpg-eponine	chr6:36474630-36475629	0.0171894	0.652696	0	0	0	0	0	3	0
ENSBTAG00000006161	MET	4:51633842-51634842	0.000957671	0.651599	0	1	0	0	0	1	0	MET proto-oncogene, receptor tyrosine kinase [Source:VGNC Symbol;Acc:VGNC:31394]
	protein_coding	chr19:27035222-27036221	0.0349927	0.651077	0	0	1	0	0	3	0
	cpg	chr8:56776001-56777000	0.0143472	0.65064	0	0	0	0	0	1	0
ENSBTAG00000039951	PRMT6	chr3:36312056-36313055	0.00695704	0.637959	1	0	1	0	0	4	0	protein arginine methyltransferase 6 [Source:VGNC Symbol;Acc:VGNC:33351]
	cpg-firstef	chr21:2535001-2536000	7.45302e-05	0.631908	0	0	0	0	0	2	0
	firstef-cpg-eponine	chr23:8809959-8810958	0.0176565	0.608011	0	0	0	0	0	13	0
ENSBTAG00000046612	ZNF292	chr9:62724922-62725921	0.0260297	0.607956	0	1	1	0	0	12	0	zinc finger protein 292 [Source:VGNC Symbol;Acc:VGNC:37239]
	protein_coding	chr27:25061481-25062480	0.0283158	0.595898	1	1	1	0	0	8	0
	protein_coding	chr7:110037001-110038000	0.0335194	0.594539	0	1	0	0	0	1	0
	protein_coding-PDCD11	chr26:23986760-23987759	0.025804	0.590814	1	1	1	0	0	2	1
	firstef	chrX:90489004-90490003	0.0388409	0.589512	0	0	0	0	0	2	0
	cpg	chr11:107287001-107288000	0.00142288	0.587862	0	0	0	0	0	1	0
ENSBTAG00000009381	LCP2	20:2135858-2136858	0.0162974	0.573723	0	1	0	0	0	2	0	lymphocyte cytosolic protein 2 [Source:VGNC Symbol;Acc:VGNC:30818]
	5S_rRNA-rRNA_gene77-ENSBTAE00000476175	chr14:576001-577000	0.0402729	0.560021	0	0	1	0	2	3	0
	cpg	chr16:17755001-17756000	0.00979452	0.55113	0	0	0	0	0	2	0
ENSBTAG00000014090	ARID5A	chr11:2557482-2558481	0.0388361	0.546043	2	2	2	0	0	9	1	AT-rich interaction domain 5A [Source:VGNC Symbol;Acc:VGNC:26131]
ENSBTAG00000006507	ADAMTS3	chr6:87705951-87706002	0.0491915	0.541843	0	1	1	0	0	7	0	ADAM metallopeptidase with thrombospondin type 1 motif 3 [Source:VGNC Symbol;Acc:VGNC:25626]
	protein_coding	chr7:110018001-110019000	0.00334644	0.538187	0	1	0	0	0	1	0
	cpg	chr8:110681001-110682000	0.0486938	0.535419	0	0	0	0	0	1	0
	cpg	chr7:69860329-69860555	0.012724	0.524744	0	0	0	0	0	1	0
ENSBTAG00000015308	SMARCE1	chr19:40855311-40856310	0.0454189	0.512909	2	2	2	0	0	4	0	SWI/SNF related, matrix associated, actin dependent regulator of chromatin, subfamily e, member 1 [Source:VGNC Symbol;Acc:VGNC:34996]
	cpg	chr3:82896001-82897000	0.0225834	0.511784	0	0	0	0	0	1	0
	PRPF40A-ARL6IP6	chr2:43468949-43469948	0.0134749	0.503972	1	0	1	0	0	9	1
	protein_coding	chr3:7183891-7184890	0.0303494	0.495629	0	1	0	0	0	0	0
ENSBTAG00000037400	TNRC18	chr25:38886204-38887203	0.00128721	0.479476	0	0	1	0	0	7	0	trinucleotide repeat containing 18 [Source:VGNC Symbol;Acc:VGNC:36203]
	5S_rRNA-rRNA_gene78-ENSBTAE00000467121	chr14:583001-584000	0.00153024	0.472884	0	0	1	0	2	1	0
ENSBTAG00000005158	NAPG	chr24:42176873-42177872	0.0404343	0.471583	0	0	0	0	0	6	1	NSF attachment protein gamma [Source:VGNC Symbol;Acc:VGNC:31884]
ENSBTAG00000015065	TMPRSS7	1:56842670-56843670	7.30803e-06	0.448418	0	1	0	0	0	0	0	transmembrane serine protease 7 [Source:VGNC Symbol;Acc:VGNC:52837]
	CACNA1C-IL17RA	chr5:108807337-108808326	0.0480313	0.437884	0	3	1	0	0	10	0
	CACNA1C-IL17RA	chr5:108807337-108808326	0.0480313	0.437884	0	3	1	0	0	10	0
	5S_rRNA-rRNA_gene167-ENSBTAE00000450766	chr21:2018001-2019000	0.0020454	0.436744	0	0	1	0	2	4	0
ENSBTAG00000015065	TMPRSS7	1:56872211-56873211	0.0446448	0.42609	0	1	0	0	0	1	0	transmembrane serine protease 7 [Source:VGNC Symbol;Acc:VGNC:52837]
	cpg-firstef-eponine	chr19:44037786-44038079	0.0330514	0.388752	0	0	0	0	0	15	0
	cpg-firstef	chr11:107285001-107286000	9.59336e-14	0.365046	0	0	0	0	0	2	0
	cpg-eponine-firstef	chr6:94868804-94869803	0.0391037	0.34165	0	0	0	0	0	6	0
	cpg-firstef	chr7:82036-83035	1.10293e-05	0.294314	0	0	0	0	0	3	0
	cpg	chr7:81036-82035	0.0398527	0.181547	0	0	0	0	0	1	0
	cpg-eponine	chr11:105022276-105022449	0.00064264	0.128357	0	0	0	0	0	2	0
ENSBTAG00000003579	FBXW4	chr26:22439884-22440883	0.0411503	-0.336091	1	1	1	0	0	6	0	F-box and WD repeat domain containing 4 [Source:VGNC Symbol;Acc:VGNC:28924]
	eponine	chr29:19448001-19449000	5.46636e-09	-0.39866	0	0	0	0	0	2	0
	eponine	chr29:19447001-19448000	3.72432e-09	-0.403163	0	0	0	0	0	1	0
	firstef-cpg	chr4:114872278-114873093	0.0181226	-0.421112	0	0	0	0	0	6	0
	protein_coding	chr26:23938774-23939773	0.0288085	-0.436974	1	1	1	0	0	2	0
	TPR-C1orf27	chr16:67460696-67461695	0.00438799	-0.510386	0	1	1	0	0	9	0
ENSBTAG00000047330	FABP5	chr14:44489354-44490353	0.0153621	-0.557586	0	1	0	0	0	2	0	fatty acid binding protein 5 [Source:NCBI gene;Acc:281760]
ENSBTAG00000017921	NELFA	chr6:116624016-116625015	0.010219	-0.573515	1	1	1	0	0	19	1	negative elongation factor complex member A [Source:VGNC Symbol;Acc:VGNC:32000]
	protein_coding-SF3A2	chr7:21390934-21391933	0.0414305	-0.578579	2	4	4	0	0	11	1
	IL4I1-ATF5	chr18:56268447-56269446	0.0243144	-0.582865	2	2	2	0	0	4	1
	IL4I1-ATF5	chr18:56268447-56269446	0.0243144	-0.582865	2	2	2	0	0	4	1
ENSBTAG00000013184	CEP120	chr27:6220831-6221312	0.00220961	-0.587027	0	2	0	0	0	5	0	centrosomal protein 120 [Source:VGNC Symbol;Acc:VGNC:27191]
ENSBTAG00000004054	PAPOLA	chr21:61357980-61358979	0.0389335	-0.591292	3	3	3	0	0	7	1	poly(A) polymerase alpha [Source:NCBI gene;Acc:338051]
	protein_coding-RUNDC1	chr19:43011294-43012293	0.0333071	-0.59453	1	0	2	0	0	4	0
	protein_coding-RUNDC1	chr19:43011294-43012293	0.0333071	-0.59453	1	0	2	0	0	4	0
	cpg	chr8:24882001-24883000	0.0345356	-0.599928	0	0	0	0	0	1	0
	cpg-firstef-eponine	chr5:12219131-12220130	0.0448035	-0.604212	0	0	0	0	0	8	0
ENSBTAG00000005696	DBF4B	chr19:44449092-44450091	0.0155462	-0.606091	2	2	2	0	0	1	0	DBF4 zinc finger B [Source:VGNC Symbol;Acc:VGNC:55812]
	DCAF13-SLC25A32	chr14:61074644-61075643	0.00560461	-0.628652	1	2	2	0	0	9	1
	DCAF13-SLC25A32	chr14:61074644-61075643	0.00560461	-0.628652	1	2	2	0	0	9	1
	SRRD-HPS4	chr17:66139501-66140500	0.0218197	-0.631745	1	1	1	0	0	6	1
	protein_coding	chr29:42197994-42198993	0.0108783	-0.671061	0	2	0	0	0	4	0
	BCCIP-UROS	chr26:45324524-45325523	0.000531448	-0.682873	2	1	2	0	0	5	1
	BCCIP-UROS	chr26:45324524-45325523	0.000531448	-0.682873	2	1	2	0	0	5	1
	ATG3-SLC35A5	chr1:57342912-57343911	0.0159726	-0.692292	2	1	2	0	0	10	1
	ATG3-SLC35A5	chr1:57342912-57343911	0.0159726	-0.692292	2	1	2	0	0	10	1
	U2-snRNA_gene440-ENSBTAE00000480668	chr19:43246329-43246521	0.00119845	-0.699102	0	0	1	0	2	4	0
	cpg	chrX:96753164-96753196	0.000866711	-0.708859	0	0	0	0	0	1	0
ENSBTAG00000019024	JAZF1	chr4:67992937-67993521	0.0250208	-0.72358	1	1	1	0	0	2	1	JAZF zinc finger 1 [Source:VGNC Symbol;Acc:VGNC:30372]
	cpg-firstef-eponine	chr23:15546049-15546948	0.0328762	-0.727104	0	0	0	0	0	4	0
	firstef-cpg-eponine	chr8:72443302-72444301	0.0280525	-0.7351	0	0	0	0	0	12	0
	eponine	chr4:41475001-41476000	0.000498503	-0.745028	0	0	0	0	0	1	0
	firstef-cpg-eponine	chr25:33672180-33673179	0.019864	-0.750711	0	0	0	0	0	5	0
ENSBTAG00000008371	FBXL20	chr19:39841088-39842072	0.00364204	-0.753503	1	1	1	0	0	3	0	F-box and leucine rich repeat protein 20 [Source:VGNC Symbol;Acc:VGNC:52776]
	cpg-eponine	chr7:98011218-98011984	0.0274599	-0.758256	0	0	0	0	0	9	0
	cpg	chr1:5278001-5279000	0.0394663	-0.758341	0	0	0	0	0	1	0
ENSBTAG00000011578	CD44	chr15:65649222-65650221	0.00236451	-0.75889	2	2	2	0	0	5	1	CD44 molecule [Source:VGNC Symbol;Acc:VGNC:54629]
	protein_coding	chr16:29079073-29080072	0.000836679	-0.782405	1	1	1	0	0	14	0
	cpg	chr1:57112090-57112095	0.0115878	-0.785139	0	0	0	0	0	1	0
	trnascan	chr3:8110001-8111000	8.79321e-06	-0.787269	0	0	0	0	0	2	0
	cpg-firstef-eponine	chr5:26298880-26299879	0.0114009	-0.796178	0	0	0	0	0	4	0
	MPLKIP-SUGCT	chr4:80928891-80929890	0.00111661	-0.799727	1	1	2	0	0	6	1
	MPLKIP-SUGCT	chr4:80928891-80929890	0.00111661	-0.799727	1	1	2	0	0	6	1
	firstef-cpg	chr10:21395149-21396148	0.00185404	-0.802755	0	0	0	0	0	6	0
	cpg	chr3:82728001-82729000	0.00228613	-0.808595	0	0	0	0	0	1	0
ENSBTAG00000020482	ASCC3	chr9:49096522-49097521	0.0125524	-0.81045	1	1	1	0	0	7	1	activating signal cointegrator 1 complex subunit 3 [Source:VGNC Symbol;Acc:VGNC:26205]
	cpg	chrX:108497001-108498000	0.0058124	-0.820805	0	0	0	0	0	1	0
ENSBTAG00000015848	PHKA1	X:78042219-78043219	0.015373	-0.82915	0	1	0	0	0	1	0	phosphorylase kinase regulatory subunit alpha 1 [Source:VGNC Symbol;Acc:VGNC:32830]
	cpg-firstef-eponine	chr18:14446179-14447178	0.00123626	-0.829879	0	0	0	0	0	16	0
	cpg	chr27:37592001-37593000	0.0494242	-0.830314	0	0	0	0	0	1	0
ENSBTAG00000020527	IDH1	chr2:96530905-96531904	0.0292884	-0.83505	1	1	1	0	0	3	0	isocitrate dehydrogenase (NADP(+)) 1, cytosolic [Source:NCBI gene;Acc:281235]
ENSBTAG00000016844	ADGB	9:84027456-84028456	0.0395762	-0.843846	0	2	0	0	0	1	0	androglobin [Source:VGNC Symbol;Acc:VGNC:25656]
ENSBTAG00000012962	SARS	chr3:34189477-34190476	0.0259995	-0.845204	1	1	1	0	0	2	0	seryl-tRNA synthetase [Source:VGNC Symbol;Acc:VGNC:34291]
	cpg-firstef-eponine	chr8:57625707-57626527	0.00274912	-0.850561	0	0	0	0	0	5	0
ENSBTAG00000010818	AEBP2	chr5:90529601-90530600	0.000230899	-0.854753	0	1	1	0	0	9	0	AE binding protein 2 [Source:VGNC Symbol;Acc:VGNC:25704]
	cpg	chrX:90350356-90351355	0.00736158	-0.891467	0	0	0	0	0	1	0
	cpg	chr29:31049001-31050000	0.0465105	-0.89345	0	0	0	0	0	1	0
	firstef-cpg-eponine	chr14:7864148-7864220	0.0446423	-0.907364	0	0	0	0	0	6	0
ENSBTAG00000002703	ATP6V1A	chr1:58434549-58435548	0.0253856	-0.907815	1	1	1	0	0	3	1	ATPase H+ transporting V1 subunit A [Source:VGNC Symbol;Acc:VGNC:26316]
	firstef-cpg	chr21:67282124-67283123	0.0160553	-0.935632	0	0	0	0	0	3	0
	firstef	chr8:57626739-57627427	0.000598755	-0.959247	0	0	0	0	0	3	0
	protein_coding	chr4:74355175-74356174	0.0205751	-0.960467	1	1	1	0	0	1	0
ENSBTAG00000019180	AP2A1	chr18:56136591-56137025	0.00210981	-0.961206	0	0	1	0	0	4	0	adaptor related protein complex 2 subunit alpha 1 [Source:VGNC Symbol;Acc:VGNC:25983]
ENSBTAG00000009881	ENTPD6	chr13:42615655-42616654	5.80468e-05	-0.964029	1	2	1	0	0	15	0	ectonucleoside triphosphate diphosphohydrolase 6 [Source:VGNC Symbol;Acc:VGNC:58980]
ENSBTAG00000009881	ENTPD6	chr13:42615655-42616654	5.80468e-05	-0.964029	1	2	1	0	0	15	0	ectonucleoside triphosphate diphosphohydrolase 6 [Source:VGNC Symbol;Acc:VGNC:58980]
ENSBTAG00000008428	UPP1	chr4:7646478-7647376	0.0478698	-0.96685	0	1	0	0	0	4	0	uridine phosphorylase 1 [Source:VGNC Symbol;Acc:VGNC:36688]
	firstef-eponine	chr6:59562032-59563031	0.0214814	-0.971757	0	0	0	0	0	8	0
	cpg	chr16:17758001-17759000	0.0300521	-0.972594	0	0	0	0	0	1	0
ENSBTAG00000020090	EPHX3	chr7:7890926-7891925	0.00762955	-0.988142	1	1	1	0	0	3	1	epoxide hydrolase 3 [Source:VGNC Symbol;Acc:VGNC:28543]
	protein_coding	chr29:42544839-42545838	0.00329498	-1.00595	0	1	0	0	0	9	0
	cpg-firstef	chr20:5011181-5012180	0.0283654	-1.01574	0	0	0	0	0	4	0
	firstef	chr5:116352314-116353313	0.0469131	-1.03117	0	0	0	0	0	1	0
ENSBTAG00000004398	IMMP2L	4:57464860-57465860	0.0185662	-1.05295	0	1	0	0	0	0	0	inner mitochondrial membrane peptidase subunit 2 [Source:VGNC Symbol;Acc:VGNC:57350]
ENSBTAG00000021921	STRBP	chr11:94419699-94420698	0.00435089	-1.09439	1	1	1	0	0	8	0	spermatid perinuclear RNA binding protein [Source:VGNC Symbol;Acc:VGNC:35421]
	protein_coding	chr23:28526912-28527911	0.019337	-1.09492	0	3	4	0	0	8	0
	cpg-eponine-firstef	chr3:13805697-13806696	0.00098207	-1.10093	0	0	0	0	0	9	0
ENSBTAG00000005785	DPY19L1	chr4:61976449-61977448	0.000252274	-1.10156	0	1	1	0	0	12	0	dpy-19 like C-mannosyltransferase 1 [Source:VGNC Symbol;Acc:VGNC:28192]
	cpg	chr14:61689559-61690558	0.000424466	-1.1114	0	0	0	0	0	1	0
	protein_coding	chr13:61910779-61911778	4.37953e-05	-1.11617	0	1	0	0	0	3	0
	cpg-firstef	chr13:52479755-52480754	0.00553635	-1.14265	0	0	0	0	0	4	0
ENSBTAG00000011482	SLC43A2	chr19:22729136-22730135	0.000117557	-1.14395	4	2	4	0	0	11	0	solute carrier family 43 member 2 [Source:VGNC Symbol;Acc:VGNC:34875]
	firstef-cpg-eponine	chr18:62208106-62209105	0.0139884	-1.16004	0	0	0	0	0	8	0
ENSBTAG00000005546	HOXB7	chr19:37879779-37880421	0.020356	-1.16019	0	0	0	0	0	5	1	homeobox B7 [Source:VGNC Symbol;Acc:VGNC:29921]
	trnascan	chr3:8102001-8103000	1.54031e-09	-1.16298	0	0	0	0	0	14	0
	cpg	chrX:28507001-28508000	0.0170849	-1.17239	0	0	0	0	0	1	0
	eponine	chr13:49011001-49012000	9.74926e-06	-1.21553	0	0	0	0	0	1	0
ENSBTAG00000022022	GUCD1	chr17:71502855-71503061	0.00893921	-1.23296	1	2	2	0	0	5	1	guanylyl cyclase domain containing 1 [Source:VGNC Symbol;Acc:VGNC:29718]
	eponine	chr13:49015001-49016000	0.000115617	-1.23907	0	0	0	0	0	1	0
ENSBTAG00000003240	C8H9orf152	chr8:99752363-99753362	0.0451668	-1.25302	0	1	1	0	0	0	0	chromosome 8 C9orf152 homolog [Source:VGNC Symbol;Acc:VGNC:52739]
	firstef-cpg	chrX:10692001-10693000	0.0116165	-1.25669	0	0	0	0	0	3	0
	cpg-firstef	chr19:43241908-43242260	0.0360535	-1.27009	0	0	0	0	0	2	0
	eponine	chr29:19433001-19434000	0.00904033	-1.2979	0	0	0	0	0	1	0
ENSBTAG00000031277	FOXL2	chr1:130185945-130186944	0.0130772	-1.3032	0	0	1	0	0	15	0	forkhead box L2 [Source:VGNC Symbol;Acc:VGNC:29093]
ENSBTAG00000004085	ASF1B	chr7:11575986-11576985	3.81533e-07	-1.31244	0	0	0	0	0	3	1	anti-silencing function 1B histone chaperone [Source:VGNC Symbol;Acc:VGNC:50605]
	firstef-cpg	chr7:21131077-21132076	0.00625164	-1.33253	0	0	0	0	0	2	0
	protein_coding	chr10:12311230-12312229	6.51026e-05	-1.35128	0	1	1	0	0	16	0
	CCT6B-ZNF830	chr19:15119572-15120571	0.000931782	-1.37194	1	0	1	0	0	4	1
	cpg-firstef	chr18:16798889-16799888	0.00259003	-1.37294	0	0	0	0	0	2	0
	cpg	chr7:71960001-71961000	0.0190637	-1.37403	0	0	0	0	0	1	0
ENSBTAG00000015972	GLRX2	chr16:12145731-12146730	0.000757038	-1.37923	1	0	1	0	0	7	1	glutaredoxin 2 [Source:VGNC Symbol;Acc:VGNC:29416]
ENSBTAG00000006071	CTTN	chr29:47511107-47511560	0.00934125	-1.38116	1	1	1	0	0	5	1	cortactin [Source:VGNC Symbol;Acc:VGNC:27821]
	cpg-firstef	chr18:65783193-65784192	0.0130696	-1.38734	0	0	0	0	0	4	0
	eponine	chr3:94439605-94439634	0.004973	-1.39833	0	0	0	0	0	1	0
ENSBTAG00000000784	MTERF4	chr3:120334719-120335070	9.55674e-08	-1.4208	0	1	1	0	0	8	0	mitochondrial transcription termination factor 4 [Source:VGNC Symbol;Acc:VGNC:55065]
	cpg	chr8:99202001-99203000	8.62017e-05	-1.44647	0	0	0	0	0	1	0
ENSBTAG00000008182	FOSB	chr18:53078894-53079893	0.0237344	-1.45673	0	0	1	1	0	2	0	FosB proto-oncogene, AP-1 transcription factor subunit [Source:VGNC Symbol;Acc:VGNC:29074]
	CIART-C1orf54	chr3:20360428-20361427	0.0124987	-1.45874	1	1	1	0	0	2	1
ENSBTAG00000013011	PLAA	chr8:17279928-17280927	0.0170981	-1.46251	1	1	1	0	0	5	1	phospholipase A2 activating protein [Source:VGNC Symbol;Acc:VGNC:32967]
	cpg-firstef	chr3:8108001-8109000	0.033828	-1.51204	0	0	0	0	0	3	0
	firstef-cpg-eponine	chr2:129301360-129302359	0.00960247	-1.52607	0	0	0	0	0	6	0
	cpg	chr11:65325001-65326000	0.0355117	-1.52954	0	0	0	0	0	1	0
ENSBTAG00000001086	FHL2	chr11:9292431-9292820	0.0326526	-1.53165	0	1	0	0	0	3	0	four and a half LIM domains 2 [Source:VGNC Symbol;Acc:VGNC:29000]
ENSBTAG00000006948	GARNL3	chr11:98140220-98140377	0.0091	-1.54231	0	1	0	0	0	1	0	GTPase activating Rap/RanGAP domain like 3 [Source:VGNC Symbol;Acc:VGNC:29253]
	cpg-firstef-eponine	chr2:54118001-54119000	0.0385875	-1.54339	0	0	0	0	0	7	0
	cpg-eponine	chr7:18936011-18937010	0.018816	-1.55086	0	0	0	0	0	8	0
	cpg	chr15:71061001-71062000	2.3736e-08	-1.5609	0	0	0	0	0	1	0
	eponine	chr13:48079001-48080000	4.75191e-22	-1.563	0	0	0	0	0	1	0
ENSBTAG00000018802	UBE2Z	chr19:37610222-37611221	0.000363637	-1.56584	0	1	1	0	0	4	0	ubiquitin conjugating enzyme E2 Z [Source:VGNC Symbol;Acc:VGNC:36598]
ENSBTAG00000021912	DUSP7	chr22:48825489-48826488	0.000896788	-1.57312	0	1	1	0	0	2	0	dual specificity phosphatase 7 [Source:VGNC Symbol;Acc:VGNC:28263]
	eponine	chr2:19901224-19901435	4.37227e-05	-1.59644	0	0	0	0	0	1	0
ENSBTAG00000010739	BLOC1S2	chr26:21183924-21184923	5.71594e-07	-1.60098	0	1	2	0	0	2	0	biogenesis of lysosomal organelles complex 1 subunit 2 [Source:VGNC Symbol;Acc:VGNC:26507]
ENSBTAG00000034691	TSTA3	chr14:1093698-1094697	0.0019394	-1.6053	1	1	1	0	0	4	1	tissue specific transplantation antigen P35B [Source:VGNC Symbol;Acc:VGNC:36450]
	eponine	chr13:48077001-48078000	1.5543e-08	-1.61267	0	0	0	0	0	2	0
	protein_coding	chr7:68830701-68831700	0.00698633	-1.61759	1	1	1	0	0	1	0
ENSBTAG00000012036	HR	chr8:69444384-69445383	0.0201224	-1.62451	1	1	1	0	0	10	0	HR lysine demethylase and nuclear receptor corepressor [Source:VGNC Symbol;Acc:VGNC:29950]
	firstef-cpg-eponine	chr25:32609598-32610597	0.0024627	-1.62724	0	0	0	0	0	4	0
	cpg-firstef	chr19:52114728-52115727	1.29524e-05	-1.63408	0	0	0	0	0	2	0
ENSBTAG00000009017	NR5A1	chr11:95534710-95535709	0.00167856	-1.65525	0	1	0	0	0	4	0	nuclear receptor subfamily 5 group A member 1 [Source:VGNC Symbol;Acc:VGNC:32248]
	cpg-eponine	chr19:40416907-40417906	4.5697e-06	-1.66163	0	0	0	0	0	6	0
	cpg	chr3:82771001-82772000	0.000342738	-1.6643	0	0	0	0	0	1	0
	cpg	chr8:56739001-56740000	0.0391582	-1.66507	0	0	0	0	0	1	0
ENSBTAG00000044195	SDK2	chr19:57984245-57985244	0.0331211	-1.67142	0	1	0	0	0	0	0	sidekick cell adhesion molecule 2 [Source:VGNC Symbol;Acc:VGNC:34394]
	cpg	chr8:74663001-74664000	0.0292305	-1.6878	0	0	0	0	0	1	0
ENSBTAG00000039415	CHMP4A	chr10:20947936-20948832	0.00117569	-1.68893	1	1	1	0	0	2	1	charged multivesicular body protein 4A [Source:VGNC Symbol;Acc:VGNC:27302]
ENSBTAG00000016716	RRS1	chr14:30686701-30687700	4.7456e-05	-1.70849	1	0	1	0	0	4	1	ribosome biogenesis regulator 1 homolog [Source:VGNC Symbol;Acc:VGNC:34173]
ENSBTAG00000019013	HECTD3	chr3:101040327-101041326	0.0148011	-1.71424	1	2	2	0	0	6	1	HECT domain E3 ubiquitin protein ligase 3 [Source:VGNC Symbol;Acc:VGNC:29802]
	eponine	chr1:11272001-11273000	4.2214e-06	-1.71629	0	0	0	0	0	2	0
	cpg-firstef	chr3:117552650-117553649	0.000859526	-1.77131	0	0	0	0	0	2	0
ENSBTAG00000003107	LHX5	chr17:60989747-60990746	0.0477937	-1.77798	0	1	1	1	0	3	0	LIM homeobox 5 [Source:VGNC Symbol;Acc:VGNC:30875]
	cpg-firstef-eponine	chr14:7108961-7109960	0.000319356	-1.79614	0	0	0	0	0	3	0
	firstef-cpg-eponine	chr17:6407663-6407664	0.0207819	-1.80893	0	0	0	0	0	7	0
	cpg	chr28:39285001-39286000	0.000890884	-1.86805	0	0	0	0	0	1	0
	UBQLN4	chr3:14713393-14714392	1.87112e-05	-1.87924	0	1	1	0	0	9	0
	cpg	chr8:36109001-36110000	0.00194986	-1.87964	0	0	0	0	0	1	0
ENSBTAG00000019332	SLC9C1	1:57037376-57038376	0.00198863	-1.89187	0	1	0	0	0	1	0	solute carrier family 9 member C1 [Source:VGNC Symbol;Acc:VGNC:53607]
	protein_coding	chr7:20354300-20355299	0.000343153	-1.94302	0	1	2	0	0	5	0
ENSBTAG00000007910	EXOC7	chr19:55560005-55560236	0.000152124	-1.96119	1	1	1	0	0	2	1	exocyst complex component 7 [Source:VGNC Symbol;Acc:VGNC:28652]
	cpg-eponine-firstef	chr14:1872731-1873730	0.00615812	-1.96177	0	0	0	0	0	8	0
ENSBTAG00000017416	KPNA4	chr1:106924960-106925959	1.7396e-07	-1.96187	0	1	1	0	0	12	0	karyopherin subunit alpha 4 [Source:VGNC Symbol;Acc:VGNC:30703]
	eponine	chr1:11270001-11271000	0.000844457	-1.96732	0	0	0	0	0	1	0
ENSBTAG00000017847	PPP1R12C	chr18:62291818-62292747	6.2948e-06	-1.96997	0	1	0	0	0	1	0	protein phosphatase 1 regulatory subunit 12C [Source:VGNC Symbol;Acc:VGNC:52229]
ENSBTAG00000019343	MDFI	chr23:15459050-15460049	0.00543845	-1.97817	0	1	1	0	0	11	0	MyoD family inhibitor [Source:VGNC Symbol;Acc:VGNC:31329]
	ANOS1	chrX:134225326-134226325	0.00792929	-1.98264	0	1	1	0	0	8	0
	cpg-firstef-eponine	chr16:42204093-42205092	0.0136189	-1.99749	0	0	0	0	0	10	0
ENSBTAG00000020989	SUSD4	chr16:26819633-26819933	0.00336979	-2.00662	1	1	1	0	0	13	0	sushi domain containing 4 [Source:VGNC Symbol;Acc:VGNC:35489]
	cpg	chr12:39225001-39226000	0.0392268	-2.05333	0	0	0	0	0	1	0
	cpg-eponine	chr5:26918871-26919870	9.21271e-09	-2.07323	0	0	0	0	0	4	0
ENSBTAG00000027058	MESP2	chr21:21187554-21188553	0.00036832	-2.08526	0	0	1	0	0	13	0	mesoderm posterior bHLH transcription factor 2 [Source:VGNC Symbol;Acc:VGNC:53945]
	5S_rRNA-rRNA_gene247-ENSBTAE00000478753	chr21:33026046-33026210	3.73885e-277	-2.08646	0	0	1	0	2	5	0
	eponine	chr29:19423001-19424000	0.012099	-2.10825	0	0	0	0	0	2	0
ENSBTAG00000009186	PAX9	chr21:46863083-46864082	0.00110545	-2.11061	1	1	1	0	0	3	1	paired box 9 [Source:VGNC Symbol;Acc:VGNC:32600]
	cpg	chr19:25502-25555	0.00249553	-2.11501	0	0	0	0	0	1	0
ENSBTAG00000006574	ARL8A	chr16:80430778-80431777	1.602e-05	-2.11915	0	1	0	0	0	0	0	ADP ribosylation factor like GTPase 8A [Source:VGNC Symbol;Acc:VGNC:26153]
	cpg	chr28:39282001-39283000	0.0430769	-2.148	0	0	0	0	0	1	0
	cpg	chr14:38713941-38713959	0.0233387	-2.1566	0	0	0	0	0	1	0
	cpg	chr8:56770001-56771000	0.012172	-2.15704	0	0	0	0	0	1	0
ENSBTAG00000004330	ENO4	chr26:37241166-37242165	7.88468e-06	-2.15885	0	1	1	0	0	3	0	enolase 4 [Source:VGNC Symbol;Acc:VGNC:28499]
	cpg	chr1:153216001-153217000	0.0104716	-2.16413	0	0	0	0	0	1	0
	cpg	chr25:30370001-30371000	8.73202e-06	-2.16858	0	0	0	0	0	1	0
	ARL8A-PTPN7	chr16:80430029-80430777	0.0087445	-2.19443	0	1	1	0	0	2	0
ENSBTAG00000008092	RAB37	19:56676271-56677271	0.00354584	-2.1947	0	1	0	0	0	1	0	RAB37, member RAS oncogene family [Source:VGNC Symbol;Acc:VGNC:33645]
ENSBTAG00000005716	CRABP2	chr3:14123189-14124188	0.015552	-2.20296	0	0	0	0	0	3	1	cellular retinoic acid binding protein 2 [Source:VGNC Symbol;Acc:VGNC:27686]
	cpg	chr2:100641001-100642000	0.00086916	-2.21833	0	0	0	0	0	1	0
ENSBTAG00000007948	SORCS1	chr26:28128969-28129968	0.0062505	-2.25925	0	0	1	0	0	11	0	sortilin related VPS10 domain containing receptor 1 [Source:VGNC Symbol;Acc:VGNC:35130]
	cpg	chr8:36075001-36076000	0.0393895	-2.2599	0	0	0	0	0	1	0
	eponine	chr3:1043001-1044000	0.027964	-2.26827	0	0	0	0	0	2	0
	protein_coding	chr3:15520080-15521079	3.63364e-06	-2.29082	0	1	1	0	0	5	0
	trnascan	chr3:8104001-8105000	1.94803e-49	-2.31345	0	0	0	0	0	5	0
ENSBTAG00000006059	TSN	2:73410586-73411586	0.00139618	-2.3169	0	0	0	0	0	1	1	translin [Source:VGNC Symbol;Acc:VGNC:36422]
	cpg	chr3:82718001-82719000	7.81764e-05	-2.36754	0	0	0	0	0	1	0
	cpg	chr11:107299001-107300000	0.00063407	-2.36861	0	0	0	0	0	1	0
ENSBTAG00000031184	CDKN1C	chr29:48727979-48728129	3.81496e-06	-2.41046	1	1	1	0	0	6	1	cyclin dependent kinase inhibitor 1C [Source:VGNC Symbol;Acc:VGNC:27144]
ENSBTAG00000000750	MSL2	chr1:133082549-133083548	2.94252e-07	-2.41587	0	0	0	0	0	13	1	MSL complex subunit 2 [Source:VGNC Symbol;Acc:VGNC:31699]
	firstef-cpg-eponine	chr18:53063894-53064893	0.0146552	-2.42752	0	0	0	0	0	8	0
	cpg-firstef	chr20:31640574-31641573	0.000974377	-2.46664	0	0	0	0	0	3	0
	cpg	chr9:64946001-64946037	0.00308075	-2.47435	0	0	0	0	0	1	0
ENSBTAG00000025809	ABHD8	chr7:5822146-5823145	2.63049e-07	-2.5	1	1	1	0	0	6	1	abhydrolase domain containing 8 [Source:VGNC Symbol;Acc:VGNC:25504]
	firstef-cpg	chr7:12989580-12990579	0.00943889	-2.50491	0	0	0	0	0	3	0
ENSBTAG00000002125	GNAL	chr24:42670653-42671652	0.0493826	-2.54149	1	1	1	0	0	8	1	G protein subunit alpha L [Source:VGNC Symbol;Acc:VGNC:29452]
ENSBTAG00000007948	SORCS1	chr26:28127969-28128968	0.0385042	-2.54665	0	1	1	0	0	2	0	sortilin related VPS10 domain containing receptor 1 [Source:VGNC Symbol;Acc:VGNC:35130]
	protein_coding	chr18:56866175-56867104	8.03546e-05	-2.56344	1	1	1	0	0	6	0
ENSBTAG00000017409	DLX3	chr19:36662457-36663456	1.47428e-05	-2.56782	1	1	1	0	0	11	0	distal-less homeobox 3 [Source:VGNC Symbol;Acc:VGNC:55816]
ENSBTAG00000003947	SSBP4	chr7:4741114-4741973	0.0345676	-2.58975	0	3	3	0	0	9	0	single stranded DNA binding protein 4 [Source:VGNC Symbol;Acc:VGNC:50021]
	firstef	chr15:6022448-6023447	0.0370504	-2.611	0	0	0	0	0	1	0
	protein_coding	chr8:44636001-44637000	3.51887e-05	-2.62066	0	1	0	0	0	1	0
	firstef-cpg-eponine	chr2:35140290-35141289	0.000451095	-2.62482	0	0	0	0	0	6	0
	firstef-cpg-eponine	chr9:33011934-33012933	0.00152407	-2.62566	0	0	0	0	0	4	0
	cpg	chr2:100642001-100643000	0.00252711	-2.6362	0	0	0	0	0	1	0
	firstef-cpg-eponine	chr3:102496960-102497731	0.00523451	-2.67048	0	0	0	0	0	6	0
	trnascan	chr3:8099592-8099712	4.14901e-65	-2.68184	0	0	0	0	0	14	0
ENSBTAG00000012083	IRX3	chr18:22614284-22615283	0.0235954	-2.70594	0	0	0	0	0	0	1	iroquois homeobox 3 [Source:VGNC Symbol;Acc:VGNC:30287]
	firstef-cpg	chr7:109158408-109159313	0.00818595	-2.73435	0	0	0	0	0	3	0
	eponine	chr29:19409001-19410000	6.91059e-09	-2.73819	0	0	0	0	0	1	0
ENSBTAG00000009873	NRN1	chr23:48992427-48992701	4.9023e-05	-2.74839	0	1	0	0	0	11	0	neuritin 1 [Source:VGNC Symbol;Acc:VGNC:32265]
ENSBTAG00000011723	GRIK5	chr18:51240359-51241358	0.00336688	-2.75399	0	2	1	0	0	1	0	glutamate ionotropic receptor kainate type subunit 5 [Source:VGNC Symbol;Acc:VGNC:57048]
	cpg-eponine-firstef	chr4:64177352-64178351	0.0097322	-2.78585	0	0	0	0	0	10	0
	eponine-firstef	chr11:22787529-22788528	0.00093622	-2.83897	0	0	0	0	0	4	0
ENSBTAG00000026369	ENC1	chr20:6916853-6917852	9.75096e-06	-2.84331	0	0	0	0	0	1	1	ectodermal-neural cortex 1 [Source:VGNC Symbol;Acc:VGNC:28489]
	eponine	chr29:19412001-19413000	1.11578e-26	-2.89245	0	0	0	0	0	1	0
	cpg	chr4:27721001-27722000	0.000289756	-2.90239	0	0	0	0	0	1	0
	cpg-eponine	chr23:51606623-51607622	0.0114809	-2.90999	0	0	0	0	0	2	0
	cpg	chr7:11059549-11059550	0.000887507	-2.94896	0	0	0	0	0	1	0
	firstef	chr18:61634754-61635508	0.0404524	-2.95608	0	0	0	0	0	1	0
ENSBTAG00000009282	PORCN	chrX:86645707-86646706	0.0227507	-2.97617	1	1	1	0	0	5	1	porcupine O-acyltransferase [Source:VGNC Symbol;Acc:VGNC:33170]
ENSBTAG00000011936	ATP8B4	chr10:60272043-60272045	0.042791	-3.0242	0	2	0	0	0	1	0	ATPase phospholipid transporting 8B4 (putative) [Source:HGNC Symbol;Acc:HGNC:13536]
	cpg-firstef	chr17:72820327-72821326	0.000633639	-3.06816	0	0	0	0	0	2	0
	cpg-firstef	chr26:25752867-25753866	0.029515	-3.07869	0	0	0	0	0	3	0
ENSBTAG00000016646	KCNA1	chr5:105269782-105270781	0.00510735	-3.10589	0	0	1	0	0	3	0	potassium voltage-gated channel subfamily A member 1 [Source:VGNC Symbol;Acc:VGNC:30420]
	cpg-firstef-eponine	chr25:32362001-32363000	5.29897e-188	-3.12063	0	0	0	0	0	11	0
	eponine	chr13:48996001-48997000	3.15246e-06	-3.1207	0	0	0	0	0	1	0
	trnascan	chr3:8103001-8104000	3.84901e-48	-3.14531	0	0	0	0	0	14	0
	cpg-firstef	chr15:80720925-80721924	0.000212402	-3.15966	0	0	0	0	0	2	0
	firstef-cpg	chr18:50368358-50368480	0.0116729	-3.20184	0	0	0	0	0	4	0
	cpg	chr1:153214001-153215000	0.00439888	-3.20484	0	0	0	0	0	1	0
	cpg	chr3:82740001-82741000	3.22413e-16	-3.22831	0	0	0	0	0	1	0
ENSBTAG00000009752	CD70	chr7:17905033-17906032	0.0302576	-3.23078	0	2	1	0	0	0	0	CD70 molecule [Source:VGNC Symbol;Acc:VGNC:52225]
	cpg-firstef-eponine	chr7:89223001-89224000	1.05958e-19	-3.23097	0	0	0	0	0	5	0
ENSBTAG00000008389	HTRA1	chr26:42284813-42285812	3.19025e-14	-3.26432	0	0	1	0	0	23	0	HtrA serine peptidase 1 [Source:VGNC Symbol;Acc:VGNC:30004]
ENSBTAG00000004907	MINK1	chr19:26495211-26496210	0.0182106	-3.2943	0	3	2	0	0	3	0	misshapen like kinase 1 [Source:VGNC Symbol;Acc:VGNC:31479]
ENSBTAG00000010180	URB2	chr28:1577740-1578739	3.05487e-13	-3.32559	1	1	1	0	0	5	0	URB2 ribosome biogenesis homolog [Source:VGNC Symbol;Acc:VGNC:57314]
	cpg	chr4:35245001-35246000	0.00312803	-3.3329	0	0	0	0	0	1	0
	5S_rRNA-rRNA_gene78-ENSBTAE00000467121	chr14:582001-583000	9.69848e-06	-3.3718	0	0	1	0	2	2	0
ENSBTAG00000000626	STK32A	chr7:58456461-58457460	0.00617185	-3.40141	0	0	0	0	0	1	1	serine/threonine kinase 32A [Source:VGNC Symbol;Acc:VGNC:35394]
ENSBTAG00000016944	ADORA2A	chr17:71599209-71600208	0.000646658	-3.46144	0	1	1	0	0	5	0	adenosine A2a receptor [Source:VGNC Symbol;Acc:VGNC:25687]
ENSBTAG00000011275	SCUBE1	chr5:114008960-114009959	0.00446071	-3.46273	0	1	0	0	0	1	0	signal peptide, CUB domain and EGF like domain containing 1 [Source:VGNC Symbol;Acc:VGNC:34371]
	cpg-firstef	chr6:14830425-14830861	0.000102048	-3.48971	0	0	0	0	0	2	0
	cpg	chr28:11370001-11371000	6.33207e-05	-3.50204	0	0	0	0	0	1	0
ENSBTAG00000027017	SIX3	chr11:27368611-27369610	0.000193388	-3.51119	0	1	1	1	0	4	0	SIX homeobox 3 [Source:VGNC Symbol;Acc:VGNC:34640]
ENSBTAG00000001305	ATP2B2	chr22:54401521-54401928	0.00229543	-3.54072	0	1	1	0	0	3	0	ATPase plasma membrane Ca2+ transporting 2 [Source:VGNC Symbol;Acc:VGNC:26294]
	cpg-firstef	chr5:26048342-26049341	0.0294069	-3.61935	0	0	0	0	0	2	0
ENSBTAG00000046666	TTC9B	chr18:49614613-49615612	0.00317605	-3.75954	1	1	1	0	0	3	0	tetratricopeptide repeat domain 9B [Source:VGNC Symbol;Acc:VGNC:36482]
	firstef-eponine	chr5:66730930-66731929	0.0350528	-3.94293	0	0	0	0	0	3	0
	firstef	chr22:59680216-59681215	0.0115198	-3.95442	0	0	0	0	0	1	0
	trnascan	chr2:112539501-112540500	0.0024975	-3.95964	0	0	0	0	0	2	0
	cpg-eponine-firstef	chr19:23307061-23308060	0.00992081	-4.02181	0	0	0	0	0	11	0
	cpg	chr1:144128001-144129000	0.00689749	-4.06029	0	0	0	0	0	1	0
	protein_coding	chr4:117226516-117227135	0.000676206	-4.09755	0	0	1	0	0	3	0
	5_8S_rRNA-rRNA_gene227-ENSBTAE00000460867	chr27:6221935-6222450	0	-4.12305	0	0	1	0	2	17	0
	eponine	chr4:41484001-41485000	2.91283e-08	-4.12543	0	0	0	0	0	1	0
	cpg	chr14:553001-554000	0.000357597	-4.14731	0	0	0	0	0	1	0
	protein_coding	chr19:36691445-36692444	0.0127263	-4.18443	1	1	1	1	0	3	0
	cpg-firstef-eponine	chr11:8986834-8987833	9.61355e-08	-4.2071	0	0	0	0	0	4	0
	cpg-firstef	chr7:14945254-14946253	0.00299225	-4.41626	0	0	0	0	0	2	0
	cpg	chr4:28974001-28975000	2.43627e-10	-4.58076	0	0	0	0	0	1	0
ENSBTAG00000013066	IGF2	chr29:49411236-49412235	3.26294e-10	-4.69917	0	1	0	0	0	14	0	Bos taurus insulin like growth factor 2 (IGF2), transcript variant 2, mRNA. [Source:RefSeq mRNA;Acc:NM_001367627]
ENSBTAG00000053199	CNIH3	chr16:27739285-27740284	0.028482	-4.70209	0	1	0	0	0	0	0	cornichon family AMPA receptor auxiliary protein 3 [Source:NCBI gene;Acc:615236]
	cpg-firstef	chr3:8107001-8108000	0.000105268	-4.72762	0	0	0	0	0	2	0
ENSBTAG00000021685	EEF1A2	chr13:54151103-54152102	1.30091e-20	-4.96857	1	1	1	0	0	5	1	eukaryotic translation elongation factor 1 alpha 2 [Source:VGNC Symbol;Acc:VGNC:50164]
	protein_coding	chr3:117073446-117074445	8.44122e-08	-5.00555	1	1	1	0	0	10	0
	protein_coding-KIAA1683	chr7:4928361-4929360	4.2878e-05	-5.06797	0	1	1	0	0	0	0
	protein_coding-KIAA1683	chr7:4928361-4929360	4.2878e-05	-5.06797	0	1	1	0	0	0	0
	cpg-firstef	chr2:22748668-22749667	0.00298553	-5.14651	0	0	0	0	0	2	0
ENSBTAG00000005190	TSC1	chr11:102975806-102976805	0.00610557	-5.31937	0	2	0	0	0	4	0	TSC complex subunit 1 [Source:VGNC Symbol;Acc:VGNC:36407]
ENSBTAG00000009975	PBX4	chr7:3711085-3712084	0.000470387	-5.39501	0	1	1	0	0	3	0	PBX homeobox 4 [Source:VGNC Symbol;Acc:VGNC:32610]
	eponine	chr3:1031001-1032000	4.60526e-08	-5.5683	0	0	0	0	0	1	0
	eponine	chr3:1042001-1043000	1.62254e-25	-5.58921	0	0	0	0	0	1	0
ENSBTAG00000005819	CCDC61	chr18:53509986-53510618	2.19296e-05	-5.712	0	1	1	0	0	6	0	coiled-coil domain containing 61 [Source:VGNC Symbol;Acc:VGNC:26906]
	firstef	chr4:117111048-117112047	0.000180496	-5.71896	0	0	0	0	0	1	0
	protein_coding	chr25:36317518-36318517	0.000195275	-5.73133	0	2	1	0	0	1	0
	AVPR1A-trnascan	chr5:50362191-50363190	0.000885261	-5.77656	0	0	0	0	0	2	1
	cpg	chr21:2106001-2107000	1.34305e-07	-5.78264	0	0	0	0	0	1	0
ENSBTAG00000010289	GEMIN8	chrX:129490726-129491725	2.05305e-98	-5.84422	0	1	0	0	0	0	0	gem nuclear organelle associated protein 8 [Source:VGNC Symbol;Acc:VGNC:29321]
ENSBTAG00000021595	HIP1R	chr17:52691180-52692179	8.16494e-07	-5.9112	0	1	0	0	0	0	0	huntingtin interacting protein 1 related [Source:VGNC Symbol;Acc:VGNC:29858]
ENSBTAG00000005922	EFCC1	chr22:58982678-58983677	3.46138e-06	-5.97339	0	1	0	0	0	3	0	EF-hand and coiled-coil domain containing 1 [Source:NCBI gene;Acc:617677]
	cpg-eponine	chr8:58753106-58753290	7.11271e-71	-5.97471	0	0	0	0	0	10	0
	firstef	chr11:97396244-97397243	0.000605134	-6.30722	0	0	0	0	0	1	0
	eponine	chr3:1021001-1022000	4.69656e-09	-6.43101	0	0	0	0	0	1	0
ENSBTAG00000005622	LITAF	chr25:10261745-10262744	2.78847e-13	-6.46991	1	1	1	0	0	8	0	lipopolysaccharide induced TNF factor [Source:VGNC Symbol;Acc:VGNC:30911]
	PIEZO2	chr24:42265870-42266869	0.000407126	-6.79517	0	2	1	0	0	0	0
	cpg-firstef-eponine	chr2:20829363-20830362	0.000261849	-6.85403	0	0	0	0	0	5	0
	cpg-firstef-eponine	chr8:23212279-23213278	2.30134e-51	-6.89555	0	0	0	0	0	5	0
ENSBTAG00000003794	GNAO1	chr18:24326266-24327265	0.000767816	-6.96144	0	1	0	0	0	0	0	G protein subunit alpha o1 [Source:VGNC Symbol;Acc:VGNC:57047]
	firstef	chr17:17475148-17476147	8.08139e-06	-7.06715	0	0	0	0	0	2	0
	5S_rRNA-rRNA_gene73-ENSBTAE00000483151	chr14:493001-494000	1.15119e-12	-7.09339	0	0	1	0	2	1	0
	cpg-firstef	chr7:89222001-89223000	3.46165e-144	-7.10723	0	0	0	0	0	5	0
ENSBTAG00000005568	FRMPD2	chr28:42635227-42636226	0.00154555	-7.32372	0	1	0	0	0	0	0	FERM and PDZ domain containing 2 [Source:VGNC Symbol;Acc:VGNC:50131]
	cpg-firstef-eponine	chr6:103189091-103190090	2.49432e-07	-7.38588	0	0	0	0	0	5	0
	cpg-eponine	chr8:23186693-23187350	2.85789e-41	-7.89716	0	0	0	0	0	2	0
ENSBTAG00000013990	WNT6	chr2:106834038-106834116	8.0837e-15	-8.01652	0	1	1	0	0	12	0	Wnt family member 6 [Source:VGNC Symbol;Acc:VGNC:36962]
	protein_coding	chr25:32367001-32368000	9.26985e-58	-8.1096	0	1	1	0	0	0	0
	protein_coding	chr11:98509024-98510023	3.06474e-08	-8.20548	0	1	0	0	0	5	0
	firstef	chr7:17227444-17228443	3.49632e-13	-8.86352	0	0	0	0	0	2	0
ENSBTAG00000003434	CERS4	chr7:16898679-16899678	4.80108e-08	-9.19531	0	1	0	0	0	1	0	ceramide synthase 4 [Source:VGNC Symbol;Acc:VGNC:27226]
ENSBTAG00000011818	COL26A1	chr25:35356349-35356564	7.56057e-09	-10.2139	0	1	0	0	0	1	0	collagen type XXVI alpha 1 chain [Source:VGNC Symbol;Acc:VGNC:52757]
	cpg-eponine-firstef	chr9:95479685-95480684	8.77095e-21	-10.9297	0	0	0	0	0	10	0
	GRN-FAM171A2	chr19:44156056-44157055	5.37233e-21	-11.4345	0	0	2	1	0	3	0
	GRN-FAM171A2	chr19:44156056-44157055	5.37233e-21	-11.4345	0	0	2	1	0	3	0
ENSBTAG00000016515	EFNA5	chr7:106542789-106543166	1.24577e-05	-12.1068	0	1	0	0	0	0	0	ephrin A5 [Source:VGNC Symbol;Acc:VGNC:28358]
	protein_coding	chr18:52827597-52828596	7.19032e-16	-13.0742	0	0	1	0	0	4	0
ENSBTAG00000024888	PDE5A	6:5788296-5789296	2.85758e-29	-13.7395	0	1	0	0	0	1	0	phosphodiesterase 5A [Source:VGNC Symbol;Acc:VGNC:32678]
ENSBTAG00000021595	HIP1R	chr17:52697180-52698179	1.80423e-16	-17.1165	0	1	1	0	0	3	0	huntingtin interacting protein 1 related [Source:VGNC Symbol;Acc:VGNC:29858]
