# Supplementary material for: Genome-Wide DNA Methylation and Gene Expression Profiles in Cows Subjected to Different Stress Level as Assessed by Cortisol in Milk
Source: Genes (Basel). 2020 Jul 25;11(8):850. doi: 10.3390/genes11080850 (PMC7464205; doi:10.3390/genes11080850)
Supplement: Supplementary file 1 [file genes-11-00850-s001.zip › Supplementary Table S3.xlsx]

## Sheet: Go_pathways
ID	Term	Input.number	Background.number	q.value	NES	Input	Hyperlink
GO:0007399	nervous system development	75	778	0.00240981	0.858934	ENSBTAG00000015308|ENSBTAG00000020426|ENSBTAG00000008887|ENSBTAG00000013184|ENSBTAG00000012777|ENSBTAG00000044118|ENSBTAG00000020425|ENSBTAG00000003741|ENSBTAG00000011598|ENSBTAG00000014119|ENSBTAG00000018576|ENSBTAG00000025181|ENSBTAG00000004119|ENSBTAG00000007592|ENSBTAG00000006838|ENSBTAG00000019627|ENSBTAG00000015549|ENSBTAG00000016646|ENSBTAG00000013287|ENSBTAG00000001400|ENSBTAG00000007603|…	http://amigo.geneontology.org/cgi-bin/amigo/term_details?term=GO:0007399
GO:0019222	regulation of metabolic process	198	2735	0.00323563	1.24881	ENSBTAG00000017368|ENSBTAG00000013309|ENSBTAG00000013066|ENSBTAG00000003457|ENSBTAG00000008389|ENSBTAG00000015308|ENSBTAG00000020425|ENSBTAG00000014259|ENSBTAG00000021869|ENSBTAG00000003741|ENSBTAG00000014016|ENSBTAG00000016975|ENSBTAG00000004054|ENSBTAG00000018631|ENSBTAG00000020482|ENSBTAG00000009435|ENSBTAG00000026181|ENSBTAG00000010992|ENSBTAG00000010990|ENSBTAG00000021685|ENSBTAG00000021442|…	http://amigo.geneontology.org/cgi-bin/amigo/term_details?term=GO:0019222
GO:0022008	neurogenesis	57	557	0.00465747	0.973436	ENSBTAG00000015308|ENSBTAG00000015874|ENSBTAG00000013184|ENSBTAG00000012777|ENSBTAG00000044118|ENSBTAG00000003741|ENSBTAG00000014119|ENSBTAG00000018576|ENSBTAG00000004119|ENSBTAG00000006838|ENSBTAG00000019627|ENSBTAG00000016646|ENSBTAG00000013287|ENSBTAG00000007424|ENSBTAG00000018373|ENSBTAG00000006451|ENSBTAG00000016071|ENSBTAG00000013888|ENSBTAG00000010123|ENSBTAG00000019596|ENSBTAG00000020979|…	http://amigo.geneontology.org/cgi-bin/amigo/term_details?term=GO:0022008
GO:0009653	anatomical structure morphogenesis	96	1137	0.00554142	0.820368	ENSBTAG00000021576|ENSBTAG00000017680|ENSBTAG00000003741|ENSBTAG00000016514|ENSBTAG00000010992|ENSBTAG00000016071|ENSBTAG00000003107|ENSBTAG00000007393|ENSBTAG00000003510|ENSBTAG00000007173|ENSBTAG00000021709|ENSBTAG00000005190|ENSBTAG00000047594|ENSBTAG00000001250|ENSBTAG00000014824|ENSBTAG00000013145|ENSBTAG00000009186|ENSBTAG00000005359|ENSBTAG00000004838|ENSBTAG00000008908|ENSBTAG00000020780|…	http://amigo.geneontology.org/cgi-bin/amigo/term_details?term=GO:0009653
GO:0045892	negative regulation of transcription, DNA-templated	51	496	0.00554142	0.646508	ENSBTAG00000015308|ENSBTAG00000016975|ENSBTAG00000000753|ENSBTAG00000003457|ENSBTAG00000012777|ENSBTAG00000020780|ENSBTAG00000021827|ENSBTAG00000014259|ENSBTAG00000020428|ENSBTAG00000020426|ENSBTAG00000011943|ENSBTAG00000027017|ENSBTAG00000007592|ENSBTAG00000013287|ENSBTAG00000039951|ENSBTAG00000001586|ENSBTAG00000019343|ENSBTAG00000010818|ENSBTAG00000006633|ENSBTAG00000009663|ENSBTAG00000017397|…	http://amigo.geneontology.org/cgi-bin/amigo/term_details?term=GO:0045892
GO:0030154	cell differentiation	123	1583	0.00554142	0.682535	ENSBTAG00000015308|ENSBTAG00000003457|ENSBTAG00000008389|ENSBTAG00000021576|ENSBTAG00000003741|ENSBTAG00000014016|ENSBTAG00000004119|ENSBTAG00000002297|ENSBTAG00000016646|ENSBTAG00000005850|ENSBTAG00000013099|ENSBTAG00000016071|ENSBTAG00000003107|ENSBTAG00000021827|ENSBTAG00000007393|ENSBTAG00000005691|ENSBTAG00000007173|ENSBTAG00000021709|ENSBTAG00000005190|ENSBTAG00000017697|ENSBTAG00000004347|…	http://amigo.geneontology.org/cgi-bin/amigo/term_details?term=GO:0030154
GO:0010629	negative regulation of gene expression	60	632	0.00554142	0.88374	ENSBTAG00000015308|ENSBTAG00000013309|ENSBTAG00000000753|ENSBTAG00000003457|ENSBTAG00000012777|ENSBTAG00000020780|ENSBTAG00000021827|ENSBTAG00000014259|ENSBTAG00000020428|ENSBTAG00000016975|ENSBTAG00000011943|ENSBTAG00000018631|ENSBTAG00000007592|ENSBTAG00000013287|ENSBTAG00000039951|ENSBTAG00000001586|ENSBTAG00000019343|ENSBTAG00000010818|ENSBTAG00000006633|ENSBTAG00000009663|ENSBTAG00000017397|…	http://amigo.geneontology.org/cgi-bin/amigo/term_details?term=GO:0010629
GO:0051171	regulation of nitrogen compound metabolic process	140	1866	0.00554142	1.11847	ENSBTAG00000017368|ENSBTAG00000013309|ENSBTAG00000003457|ENSBTAG00000008389|ENSBTAG00000015308|ENSBTAG00000014259|ENSBTAG00000021869|ENSBTAG00000003741|ENSBTAG00000014016|ENSBTAG00000016975|ENSBTAG00000004054|ENSBTAG00000018631|ENSBTAG00000020482|ENSBTAG00000009435|ENSBTAG00000010990|ENSBTAG00000009663|ENSBTAG00000003107|ENSBTAG00000007494|ENSBTAG00000005546|ENSBTAG00000014090|ENSBTAG00000005691|…	http://amigo.geneontology.org/cgi-bin/amigo/term_details?term=GO:0051171
GO:0010468	regulation of gene expression	137	1823	0.00554142	1.05556	ENSBTAG00000017368|ENSBTAG00000013309|ENSBTAG00000003457|ENSBTAG00000008389|ENSBTAG00000015308|ENSBTAG00000014259|ENSBTAG00000021869|ENSBTAG00000003741|ENSBTAG00000014016|ENSBTAG00000016975|ENSBTAG00000004054|ENSBTAG00000018631|ENSBTAG00000020482|ENSBTAG00000010992|ENSBTAG00000010990|ENSBTAG00000009663|ENSBTAG00000003107|ENSBTAG00000007494|ENSBTAG00000005546|ENSBTAG00000014090|ENSBTAG00000005691|…	http://amigo.geneontology.org/cgi-bin/amigo/term_details?term=GO:0010468
GO:0048699	generation of neurons	51	510	0.00554142	0.610186	ENSBTAG00000015874|ENSBTAG00000038221|ENSBTAG00000012777|ENSBTAG00000044118|ENSBTAG00000003741|ENSBTAG00000014119|ENSBTAG00000018576|ENSBTAG00000004119|ENSBTAG00000006838|ENSBTAG00000019627|ENSBTAG00000016646|ENSBTAG00000013287|ENSBTAG00000007424|ENSBTAG00000006451|ENSBTAG00000016071|ENSBTAG00000013888|ENSBTAG00000010123|ENSBTAG00000019596|ENSBTAG00000020979|ENSBTAG00000007070|ENSBTAG00000003602|…	http://amigo.geneontology.org/cgi-bin/amigo/term_details?term=GO:0048699
