# Supplementary material for: Genome-Wide DNA Methylation and Gene Expression Profiles in Cows Subjected to Different Stress Level as Assessed by Cortisol in Milk
Source: Genes (Basel). 2020 Jul 25;11(8):850. doi: 10.3390/genes11080850 (PMC7464205; doi:10.3390/genes11080850)
Supplement: Supplementary file 1 [file genes-11-00850-s001.zip › Supplementary Table S4.xlsx]

## Sheet: Top20_Kegg_Enrichment
ID	Term	Gene_number	Background.number	q.value	NES	Input	Hyperlink
bta04144	Endocytosis	13	223	0.0138035	0.813381	ENSBTAG00000006161|ENSBTAG00000014691|ENSBTAG00000008468|ENSBTAG00000030749|ENSBTAG00000019180|ENSBTAG00000006792|ENSBTAG00000039415|ENSBTAG00000010386|ENSBTAG00000013725|ENSBTAG00000007173|ENSBTAG00000043994|ENSBTAG00000013589|ENSBTAG00000005345
bta04340	Hedgehog signaling pathway	4	40	0.0321576	0.840038	ENSBTAG00000008452|ENSBTAG00000013287|ENSBTAG00000017550|ENSBTAG00000016071	http://www.genome.jp/kegg-bin/show_pathway?bta04340/bta:539308%09red/bta:407190%09red/bta:522714%09red/bta:540830%09red
bta04360	Axon guidance	9	162	0.0418422	0.466483	ENSBTAG00000013958|ENSBTAG00000033423|ENSBTAG00000037604|ENSBTAG00000009851|ENSBTAG00000015670|ENSBTAG00000006161|ENSBTAG00000038221|ENSBTAG00000016515|ENSBTAG00000013287	http://www.genome.jp/kegg-bin/show_pathway?bta04360/bta:280855%09red/bta:539742%09red/bta:616742%09red/bta:536815%09red/bta:614453%09red/bta:539308%09red/bta:534526%09red/bta:617714%09red/bta:540776%09red
bta04015	Rap1 signaling pathway	10	192	0.0477813	0.620823	ENSBTAG00000008952|ENSBTAG00000007173|ENSBTAG00000001400|ENSBTAG00000005557|ENSBTAG00000033423|ENSBTAG00000006161|ENSBTAG00000038221|ENSBTAG00000016515|ENSBTAG00000009381|ENSBTAG00000016944	http://www.genome.jp/kegg-bin/show_pathway?bta04015/bta:513244%09red/bta:280855%09red/bta:532839%09red/bta:616742%09red/bta:617828%09red/bta:614453%09red/bta:534923%09red/bta:282301%09red/bta:540776%09red/bta:504856%09red
bta04380	Osteoclast differentiation	7	118	0.0501423	0.562787	ENSBTAG00000007213|ENSBTAG00000012695|ENSBTAG00000001400|ENSBTAG00000001086|ENSBTAG00000008182|ENSBTAG00000021709|ENSBTAG00000009381	http://www.genome.jp/kegg-bin/show_pathway?bta04380/bta:513244%09red/bta:540819%09red/bta:508890%09red/bta:507100%09red/bta:534923%09red/bta:327666%09red/bta:510008%09red
bta04660	T cell receptor signaling pathway	6	97	0.0516612	1.273	ENSBTAG00000013958|ENSBTAG00000001400|ENSBTAG00000014698|ENSBTAG00000012695|ENSBTAG00000015670|ENSBTAG00000009381	http://www.genome.jp/kegg-bin/show_pathway?bta04660/bta:513244%09red/bta:539742%09red/bta:515377%09red/bta:508890%09red/bta:534526%09red/bta:534923%09red
bta05211	Renal cell carcinoma	4	58	0.080607	1.03825	ENSBTAG00000006161|ENSBTAG00000015670|ENSBTAG00000013958|ENSBTAG00000001400	http://www.genome.jp/kegg-bin/show_pathway?bta05211/bta:534526%09red/bta:280855%09red/bta:539742%09red/bta:534923%09red
bta04530	Tight junction	6	126	0.156113	1.25434	ENSBTAG00000008719|ENSBTAG00000001400|ENSBTAG00000005557|ENSBTAG00000002580|ENSBTAG00000014182|ENSBTAG00000006071	http://www.genome.jp/kegg-bin/show_pathway?bta04530/bta:506939%09red/bta:526848%09red/bta:505708%09red/bta:534923%09red/bta:514212%09red/bta:504856%09red
bta04020	Calcium signaling pathway	7	162	0.157222	1.25601	ENSBTAG00000002344|ENSBTAG00000001305|ENSBTAG00000015848|ENSBTAG00000027051|ENSBTAG00000002125|ENSBTAG00000007173|ENSBTAG00000016944	http://www.genome.jp/kegg-bin/show_pathway?bta04020/bta:100336808%09red/bta:518283%09red/bta:617828%09red/bta:515971%09red/bta:613800%09red/bta:282301%09red/bta:100124520%09red
bta04727	GABAergic synapse	4	78	0.188638	0.940153	ENSBTAG00000006550|ENSBTAG00000007644|ENSBTAG00000047894|ENSBTAG00000017239	http://www.genome.jp/kegg-bin/show_pathway?bta04727/bta:513785%09red/bta:618399%09red/bta:100301361%09red/bta:282531%09red
bta04064	NF-kappa B signaling pathway	4	84	0.222906	1.27111	ENSBTAG00000014698|ENSBTAG00000021105|ENSBTAG00000000753|ENSBTAG00000012695	http://www.genome.jp/kegg-bin/show_pathway?bta04064/bta:515377%09red/bta:533692%09red/bta:534722%09red/bta:508890%09red
bta05032	Morphine addiction	4	85	0.228771	0.829664	ENSBTAG00000007644|ENSBTAG00000047894|ENSBTAG00000017239|ENSBTAG00000043994	http://www.genome.jp/kegg-bin/show_pathway?bta05032/bta:513785%09red/bta:618399%09red/bta:100301361%09red/bta:521413%09red
bta04721	Synaptic vesicle cycle	3	58	0.235032	0.592584	ENSBTAG00000002703|ENSBTAG00000047894|ENSBTAG00000019180	http://www.genome.jp/kegg-bin/show_pathway?bta04721/bta:784636%09red/bta:100301361%09red/bta:282147%09red
bta04060	Cytokine-cytokine receptor interaction	8	206	0.23647	0.935572	ENSBTAG00000000130|ENSBTAG00000046266|ENSBTAG00000031725|ENSBTAG00000017697|ENSBTAG00000006161|ENSBTAG00000011067|ENSBTAG00000007173|ENSBTAG00000007424	http://www.genome.jp/kegg-bin/show_pathway?bta04060/bta:280855%09red/bta:525040%09red/bta:100551513%09red/bta:514803%09red/bta:538567%09red/bta:280840%09red/bta:521748%09red/bta:282301%09red
bta04520	Adherens junction	3	62	0.264612	0.816671	ENSBTAG00000006161|ENSBTAG00000005557|ENSBTAG00000014182	http://www.genome.jp/kegg-bin/show_pathway?bta04520/bta:280855%09red/bta:526848%09red/bta:504856%09red
bta00230	Purine metabolism	6	168	0.34477	1.14995	ENSBTAG00000024888|ENSBTAG00000017147|ENSBTAG00000009881|ENSBTAG00000015743|ENSBTAG00000020196|ENSBTAG00000010577	http://www.genome.jp/kegg-bin/show_pathway?bta00230/bta:529405%09red/bta:508097%09red/bta:404170%09red/bta:281972%09red/bta:281613%09red/bta:533000%09red
bta04919	Thyroid hormone signaling pathway	4	104	0.345221	0.959405	ENSBTAG00000018635|ENSBTAG00000025424|ENSBTAG00000017802|ENSBTAG00000001400	http://www.genome.jp/kegg-bin/show_pathway?bta04919/bta:536128%09red/bta:534923%09red/bta:788329%09red/bta:282598%09red
bta04012	ErbB signaling pathway	3	74	0.354994	1.12305	ENSBTAG00000015670|ENSBTAG00000013958|ENSBTAG00000001400	http://www.genome.jp/kegg-bin/show_pathway?bta04012/bta:534526%09red/bta:534923%09red/bta:539742%09red
bta04722	Neurotrophin signaling pathway	4	106	0.357742	0.994701	ENSBTAG00000021105|ENSBTAG00000008719|ENSBTAG00000010223|ENSBTAG00000001400	http://www.genome.jp/kegg-bin/show_pathway?bta04722/bta:534923%09red/bta:505708%09red/bta:533692%09red/bta:532393%09red
bta04510	Focal adhesion	6	177	0.388915	1.31155	ENSBTAG00000013958|ENSBTAG00000001400|ENSBTAG00000017970|ENSBTAG00000015670|ENSBTAG00000006161|ENSBTAG00000007173	http://www.genome.jp/kegg-bin/show_pathway?bta04510/bta:280855%09red/bta:539742%09red/bta:768226%09red/bta:534526%09red/bta:534923%09red/bta:282301%09red
