# Supplementary material for: Genome-Wide DNA Methylation and Gene Expression Profiles in Cows Subjected to Different Stress Level as Assessed by Cortisol in Milk
Source: Genes (Basel). 2020 Jul 25;11(8):850. doi: 10.3390/genes11080850 (PMC7464205; doi:10.3390/genes11080850)
Supplement: Supplementary file 1 [file genes-11-00850-s001.zip › Supplementary Table S5.xlsx]

## Sheet: DEG HIGH vs LOW
gene name	log2FoldChange	qvalue	entrezgene	wikigene_description
SAXO1	0.531497	0.00022155	539526	stabilizer of axonemal microtubules 1
FAM84A	0.487764	0.00070176	539071	family with sequence similarity 84 member A
CA2	0.419113	0.00472915	280740	carbonic anhydrase II
RUNX1T1	0.404831	0.00568741	538628	RUNX1 translocation partner 1
ABCA13	0.403461	0.00623563
PKIG	0.401957	0.00677746	404169	protein kinase (cAMP-dependent, catalytic) inhibitor gamma
MYO5C	0.388394	0.00790542
LHFPL2	0.388004	0.00895223	616131	lipoma HMGIC fusion partner-like 2
TTC32	0.383223	0.00527991	525750	tetratricopeptide repeat domain 32
TTC38	0.381829	0.00116559	616471	tetratricopeptide repeat domain 38
bta-mir-2383	0.377853	0.0112687
HTRA1	0.377802	0.00971296	282326	HtrA serine peptidase 1
KLHDC1	0.373624	0.0103731	537136	kelch domain containing 1
SMAD7	0.373494	0.00961343	535916	SMAD family member 7
TRIM44	0.371333	0.00967751	782816	tripartite motif containing 44
RASAL1	0.369012	0.0120943	512872	RAS protein activator like 1
RPL17	0.367617	0.00996147	514046	ribosomal protein L17
AMN	0.365607	0.0142453	767976	amnion associated transmembrane protein
ANKDD1B	0.365326	0.00391643
KLHDC8A	0.364705	0.0125878	532283	kelch domain containing 8A
CPA4	0.363903	0.0145507
TMEM237	0.363518	0.0145239	515467	transmembrane protein 237
F2RL2	0.360219	0.0115923	512581	coagulation factor II thrombin receptor like 2
C1GALT1	0.359493	0.015113	539417	core 1 synthase, glycoprotein-N-acetylgalactosamine 3-beta-galactosyltransferase 1
TIGD7	0.357118	0.00714344
BCAR3	0.355721	0.0119149	506231	breast cancer anti-estrogen resistance 3
SLC16A14	0.354322	0.0169209	539153	solute carrier family 16 member 14
NDUFA1	0.353936	0.0175244	327673	NADH:ubiquinone oxidoreductase subunit A1
CCDC62	0.35373	0.0173954	515631	coiled-coil domain containing 62
HBG	0.351871	0.00111101	107131172	hemoglobin, gamma
HBG	0.351871	0.00111101	511735	hemoglobin, gamma
SYNE4	0.351437	0.00816651
DYNC2LI1	0.348217	0.01185	507311	dynein cytoplasmic 2 light intermediate chain 1
FAM43A	0.347485	0.0133153	539374	family with sequence similarity 43 member A
MCAM	0.347441	0.0161001	281301	melanoma cell adhesion molecule
HBB	0.346839	0.00150849	280813	hemoglobin, beta
VSIG2	0.346278	0.0181292	616943	V-set and immunoglobulin domain containing 2
FOLR2	0.346127	0.0168902	507672	folate receptor 2 (fetal)
CEP112	0.345177	0.00894752
RETN	0.342072	0.00855688	369020	resistin
XIAP	0.339873	0.0182323	281647	X-linked inhibitor of apoptosis
SNED1	0.337337	0.0201401
GCSAM	0.33657	0.00884835	784939	germinal center associated signaling and motility
NBEAL1	0.334885	0.0160664	524280	neurobeachin like 1
FRS2	0.33136	0.0243493	538624	fibroblast growth factor receptor substrate 2
NFU1	0.330423	0.0125122	615964	NFU1 iron-sulfur cluster scaffold
SLC6A1	0.330395	0.0197945	407118	solute carrier family 6 member 1
HACD1	0.329362	0.0263219	615191	3-hydroxyacyl-CoA dehydratase 1
ZNF449	0.327161	0.0236159	512036	zinc finger protein 449
SYNGR1	0.326783	0.0285494	534995	synaptogyrin 1
RBBP9	0.326204	0.0224356	513835	RB binding protein 9, serine hydrolase
CBLB	0.32574	0.0246976	525906	Cbl proto-oncogene B
ZBTB5	0.325552	0.00920106	518910	zinc finger and BTB domain containing 5
UBN2	0.324922	0.0256804	540792	ubinuclein 2
TMEM128	0.323021	0.020894	513824	transmembrane protein 128
SNX30	0.321368	0.0256752
CR2	0.319725	0.0317712	407126	complement C3d receptor 2
LGR4	0.317734	0.0268487	505423	leucine rich repeat containing G protein-coupled receptor 4
CBFA2T2	0.312678	0.036188	527740	CBFA2/RUNX1 translocation partner 2
SNTB1	0.31115	0.0195914
TRIM58	0.309359	0.0380131	525584	tripartite motif containing 58
ODF2L	0.30928	0.0346505	533508	outer dense fiber of sperm tails 2 like
TNNT3	0.308853	0.0380982	282096	troponin T3, fast skeletal type
ETFBKMT	0.308684	0.0324784	530461	electron transfer flavoprotein beta subunit lysine methyltransferase
ALAS2	0.308117	0.0198374	511791	5'-aminolevulinate synthase 2
COMMD6	0.307529	0.0317965	616226	COMM domain containing 6
COMMD6	0.307529	0.0317965	101903064	COMM domain containing 6
ABCC8	0.30735	0.0268445	538996	ATP binding cassette subfamily C member 8
STARD6	0.307272	0.0388436	532195	StAR related lipid transfer domain containing 6
PTGS2	0.30644	0.0275538	282023	prostaglandin-endoperoxide synthase 2
B4GALNT4	0.305434	0.0368751
PGBD5	0.3044	0.0413813	101907907	piggyBac transposable element derived 5
AGO3	0.304066	0.0326833	406231	argonaute RISC catalytic component 3
PHLDB3	0.303385	0.0415039	533145	pleckstrin homology like domain family B member 3
KCNG1	0.303316	0.0421433	539813	potassium voltage-gated channel modifier subfamily G member 1
RPS7	0.303211	0.0416849	505507	ribosomal protein S7
KLHL14	0.3027	0.039195	517316	kelch like family member 14
ALS2	0.302529	0.024025	535750	ALS2, alsin Rho guanine nucleotide exchange factor
OTOP1	0.300487	0.0192094	525643	otopetrin 1
RNF215	0.299544	0.021537	530174	ring finger protein 215
GNAQ	0.299512	0.039741	536654	G protein subunit alpha q
ADAM28	0.299283	0.0424925
CHRND	0.298839	0.0358649	281687	cholinergic receptor nicotinic delta subunit
ADGRG5	0.297836	0.0202385	509974	adhesion G protein-coupled receptor G5
FUT10	0.29772	0.0418339	360195	fucosyltransferase 10
CCDC183	0.297481	0.0423053	618673	coiled-coil domain containing 183
ZBTB25	0.296936	0.0453986	538889	zinc finger and BTB domain containing 25
LLPH	0.296751	0.045441	510518	LLP homolog, long-term synaptic facilitation
ZBTB10	0.296694	0.0428933
RYR3	0.294778	0.0133273
FFAR2	0.294687	0.0481134	522431	free fatty acid receptor 2
LPIN1	0.294336	0.0441941
PDP1	0.294186	0.0471738	280891	pyruvate dehyrogenase phosphatase catalytic subunit 1
TAF1A	0.293584	0.0487089	505051	TATA-box binding protein associated factor, RNA polymerase I subunit A
NEMP1	0.293578	0.0415376	533988	nuclear envelope integral membrane protein 1
TFDP2	0.292934	0.040344	506114	transcription factor Dp-2
PTPN4	0.292397	0.0496991
IL4I1	0.291279	0.0452504	104968452	interleukin 4 induced 1
GATA2	0.289369	0.034718	506809	GATA binding protein 2
SHCBP1L	0.288139	0.0327469	528041	SHC binding and spindle associated 1 like
TMEM64	0.286243	0.0431937
PDCD5	0.285381	0.0257231	509123	programmed cell death 5
EPHX4	0.285155	0.0496307	524246	epoxide hydrolase 4
MRPL50	0.282991	0.0347709	514753	mitochondrial ribosomal protein L50
PROM1	0.282155	0.0320815	618054	prominin 1
C15orf61	0.281958	0.0238881
MNS1	0.280991	0.00765285	532884	meiosis specific nuclear structural 1
COX6C	0.278168	0.0284015
CHST10	0.277205	0.0311757	511215	carbohydrate sulfotransferase 10
CLIP4	0.277021	0.0319907	515213	CAP-Gly domain containing linker protein family member 4
HBM	0.273645	0.00554558	100140603	hemoglobin subunit mu
MTRR	0.271228	0.0282146	507991	5-methyltetrahydrofolate-homocysteine methyltransferase reductase
IL23R	0.26983	0.0473308	614367	interleukin 23 receptor
bta-mir-138-1	0.268206	0.018403
GSTA4	0.264952	0.0383376	533917	glutathione S-transferase alpha 4
NRF1	0.264351	0.0184241	509232	nuclear respiratory factor 1
OLFM1	0.262544	0.0365675	507002	olfactomedin 1
PURA	0.26145	0.042906	782746	purine rich element binding protein A
ADGRA3	0.260806	0.0416427	541147	adhesion G protein-coupled receptor A3
TMEM163	0.259152	0.0493843	534678	transmembrane protein 163
SNX29	0.258762	0.0491318	518366	sorting nexin 29
SNX29	0.258762	0.0491318	104975843	sorting nexin 29
SESN1	0.256987	0.0444408	538226	sestrin 1
EGR3	0.255652	0.0444361	526233	early growth response 3
REEP1	0.255077	0.00894347	616916	receptor accessory protein 1
SLC7A4	0.253952	0.042676	504923	solute carrier family 7 member 4
PIGZ	0.252217	0.0189539	525407	phosphatidylinositol glycan anchor biosynthesis class Z
CCDC15	0.248575	0.0403869
FGL1	0.247288	0.0258515	508090	fibrinogen like 1
MMP15	0.246246	0.0318836	282887	matrix metallopeptidase 15
IFT52	0.246146	0.0122454	513908	intraflagellar transport 52
FAM120B	0.24362	0.045008	524306	family with sequence similarity 120B
SLC17A8	0.243363	0.00893322	529659	solute carrier family 17 member 8
MTPAP	0.241879	0.0450018	511412	mitochondrial poly(A) polymerase
bta-mir-331	0.239677	0.0204275
FAM171B	0.237822	0.0172387	614438	family with sequence similarity 171 member B
C9orf40	0.224804	0.0485227
ABHD3	0.221886	0.0369606
SP7	0.217192	0.0446703	531995	Sp7 transcription factor
RAB3IL1	0.21664	0.0391863	614335	RAB3A interacting protein (rabin3)-like 1
RAB22A	0.210058	0.0350577	617385	RAB22A, member RAS oncogene family
TNF	0.204311	0.0401635	280943	tumor necrosis factor
CAV2	0.197048	0.0381364	493642	caveolin 2
RHAG	0.177922	0.0190337	281454	Rh-associated glycoprotein
TM4SF1	0.1779	0.0202804	533038	transmembrane 4 L six family member 1
GNPAT	0.175067	0.0165116
PAX2	0.169755	0.03591	100297382	paired box 2
CLEC2A	0.157861	0.0360569
COL1A2	0.156572	0.0282458	282188	collagen type I alpha 2 chain
GORASP2	-0.128489	0.0443083	513771	golgi reassembly stacking protein 2, 55kDa
MPHOSPH8	-0.150029	0.0423647	507091	M-phase phosphoprotein 8
ANKDD1A	-0.151812	0.0244862
PHF12	-0.169198	0.0311228	507057	PHD finger protein 12
OXA1L	-0.171001	0.0380179	520335	OXA1L, mitochondrial inner membrane protein
ESRP1	-0.185604	0.0241861	788414	epithelial splicing regulatory protein 1
ESRP1	-0.185604	0.0241861	538640	epithelial splicing regulatory protein 1
EPHB4	-0.194913	0.0356752	515756	EPH receptor B4
CCDC89	-0.195809	0.021282	538595	coiled-coil domain containing 89
EVI2B	-0.198194	0.0167072	617442	ecotropic viral integration site 2B
PIAS1	-0.199673	0.0496807	509231	protein inhibitor of activated STAT 1
MTHFD1L	-0.202469	0.0488738	534296	methylenetetrahydrofolate dehydrogenase (NADP+ dependent) 1-like
MYOM1	-0.207095	0.0423114	538404	myomesin 1, 185kDa
COCH	-0.212361	0.0269368	504316	cochlin
CYB5A	-0.215288	0.0325468	281110	cytochrome b5 type A (microsomal)
EPM2A	-0.21895	0.0462658	526888	epilepsy, progressive myoclonus type 2A, Lafora disease (laforin)
COL6A1	-0.219515	0.0425657	511422	collagen type VI alpha 1 chain
PRDM1	-0.219951	0.0464182	538384	PR/SET domain 1
CS	-0.220916	0.0191936	280682	citrate synthase
PLEKHM2	-0.22544	0.0303239	515552	pleckstrin homology and RUN domain containing M2
CSF2RA	-0.226983	0.0473698
SLC37A1	-0.22982	0.0282138	511558	solute carrier family 37 member 1
GRIA3	-0.235106	0.0425883
TRIM26	-0.235236	0.047907
NCLN	-0.236377	0.0399496	531802	nicalin
TBL1Y	-0.240203	0.0327013
RHBDD1	-0.241021	0.0153636	533985	rhomboid domain containing 1
TMEM184B	-0.244434	0.0373781	514220	transmembrane protein 184B
FOXRED1	-0.244713	0.0387418	510097	FAD dependent oxidoreductase domain containing 1
GPX2	-0.246258	0.0169507	533088	glutathione peroxidase 2
CTCFL	-0.248229	0.00941201	100144618	CCCTC-binding factor like
CARS	-0.250795	0.0381585	515715	cysteinyl-tRNA synthetase
ISLR	-0.255016	0.0312307	515018	immunoglobulin superfamily containing leucine rich repeat
FZD2	-0.255213	0.0374888	538507	frizzled class receptor 2
SLC26A6	-0.255547	0.0272525	514514	solute carrier family 26 member 6
EPB41L3	-0.255877	0.0389161	532616	erythrocyte membrane protein band 4.1 like 3
LTBP3	-0.258587	0.0479751	532772	latent transforming growth factor beta binding protein 3
CARMIL3	-0.258851	0.0495678	517186	capping protein regulator and myosin 1 linker 3
PAX8	-0.266858	0.0477835	534661	paired box 8
E2F2	-0.267784	0.0432463
LYPD8	-0.269596	0.0291602	617425	LY6/PLAUR domain containing 8
NINJ2	-0.269969	0.0358325	509556	ninjurin 2
P2RY13	-0.270675	0.0361376	782774	purinergic receptor P2Y13
LMNB1	-0.270812	0.00694632	540643	lamin B1
MAP3K21	-0.271479	0.0394547
EFHD1	-0.27357	0.015842	522462	EF-hand domain family member D1
PBX2	-0.274331	0.0115022	100139739	PBX homeobox 2
RAB25	-0.274803	0.0483078	506482	RAB25, member RAS oncogene family
DDX19B	-0.274926	0.0148958	517438	DEAD (Asp-Glu-Ala-As) box polypeptide 19B
Mx1	-0.275634	0.0327444
RAD51	-0.277275	0.0428927	514749	RAD51 recombinase
COL5A3	-0.277341	0.0217177
C12orf75	-0.27773	0.0235087
LRRC59	-0.27951	0.0205308	532659	leucine rich repeat containing 59
SYN2	-0.280684	0.00861452	782758	synapsin II
CBX2	-0.281213	0.0339239	506628	chromobox 2
PDLIM7	-0.281427	0.00838897	533851	PDZ and LIM domain 7
SNORD26	-0.283335	0.0121247
MS4A8	-0.283678	0.0334802	415111	membrane spanning 4-domains A8
TMPRSS2	-0.284119	0.0253745	511037	transmembrane protease, serine 2
LIMK2	-0.284233	0.0200976	513539	LIM domain kinase 2
NLRP12	-0.284491	0.0403871
SESN2	-0.286055	0.0497415	509863	sestrin 2
HIST1H2AC	-0.286171	0.0495642	524808	histone cluster 1, H2ac
HIST1H2AC	-0.286171	0.0495642	506900	histone cluster 1, H2ac
PLPP5	-0.286967	0.0216949	616337	phospholipid phosphatase 5
IL23A	-0.287049	0.0333434	511022	interleukin 23 subunit alpha
CDA	-0.28774	0.0445758	616377	cytidine deaminase
ABCA7	-0.288317	0.0246047	511762	ATP binding cassette subfamily A member 7
MTFR2	-0.291802	0.0475678	534254	mitochondrial fission regulator 2
CD177	-0.293148	0.0116968	616350	CD177 molecule
CDC6	-0.293399	0.0443221	515301	cell division cycle 6
KREMEN1	-0.294499	0.0418896
IFIT5	-0.295407	0.0446617	515091	interferon induced protein with tetratricopeptide repeats 5
GINS2	-0.295741	0.0475884	100299171	GINS complex subunit 2
DRAM1	-0.295961	0.0330368	533992	DNA damage regulated autophagy modulator 1
EIF2AK2	-0.296216	0.0472375	347700	eukaryotic translation initiation factor 2 alpha kinase 2
UBE2L6	-0.297555	0.0453243	509471	ubiquitin conjugating enzyme E2 L6
IL17REL	-0.29871	0.0327621
SFN	-0.298858	0.0380688	528453	stratifin
HCN2	-0.298936	0.0451527	100297361	hyperpolarization activated cyclic nucleotide gated potassium channel 2
OAS1X	-0.299084	0.0238094	347699	2',5'-oligoadenylate synthetase 1, 40/46kDa
OAS1X	-0.299084	0.0238094	519922	2',5'-oligoadenylate synthetase 1, 40/46kDa
FANCI	-0.299284	0.0411306	522442	Fanconi anemia complementation group I
NEIL3	-0.299926	0.0424154	515343	nei like DNA glycosylase 3
STAT2	-0.299944	0.0374707	511023	signal transducer and activator of transcription 2
IL21R	-0.300205	0.011487	617967	interleukin 21 receptor
KNTC1	-0.302112	0.0426894	506353	kinetochore associated 1
SPAG5	-0.302391	0.0420368	504585	sperm associated antigen 5
MCM2	-0.30258	0.0401729
CHTF18	-0.303312	0.0405496	517007	chromosome transmission fidelity factor 18
CHAF1B	-0.303496	0.00418193	511654	chromatin assembly factor 1 subunit B
TRMT10B	-0.303668	0.00630412
MYBL2	-0.304128	0.0415892	510420	MYB proto-oncogene like 2
ASIP	-0.305209	0.00136566	404192	agouti signaling protein
SLC39A8	-0.305751	0.0405244	508193	solute carrier family 39 member 8
LGALS3BP	-0.307504	0.0296728	531137	galectin 3 binding protein
RUFY4	-0.308257	0.0367271	523588	RUN and FYVE domain containing 4
TLE2	-0.30982	0.0317554	533595	transducin like enhancer of split 2
CSF3R	-0.310029	0.0250584	511511	colony stimulating factor 3 receptor
OGN	-0.310037	0.0377585	280884	osteoglycin
FOXM1	-0.310143	0.037243	513643	forkhead box M1
ABI2	-0.310233	0.0218791	537711	abl interactor 2
HERC5	-0.312274	0.0354558	514373	HECT and RLD domain containing E3 ubiquitin protein ligase 5
CDC25A	-0.312607	0.0362512	520188	cell division cycle 25A
ATP9A	-0.314354	0.0352308	516579	ATPase phospholipid transporting 9A (putative)
REC8	-0.316151	0.0328945	516291	REC8 meiotic recombination protein
IFIH1	-0.316992	0.0290091	535490	interferon induced with helicase C domain 1
CDH10	-0.318212	0.0280752	541259	cadherin 10
GABARAPL1	-0.318773	0.0146012	338472	GABA type A receptor associated protein like 1
HJURP	-0.319172	0.0279431	617456	Holliday junction recognition protein
ADA	-0.320186	0.0214372	280712	adenosine deaminase
GP1BB	-0.321384	0.0311964
CHAF1A	-0.321743	0.0197253	504535	chromatin assembly factor 1 subunit A
MYL6B	-0.321981	0.0255906	515421	myosin light chain 6B
IFI44	-0.324569	0.0295754	508348	interferon induced protein 44
KIAA1324L	-0.32683	0.0233656	518313	KIAA1324 like
S100A9	-0.327316	0.011608	532569	S100 calcium binding protein A9
CCL16	-0.329129	0.02728	616732	C-C motif chemokine ligand 16
ADGRG3	-0.329602	0.0240737	529961	adhesion G protein-coupled receptor G3
UPP1	-0.330435	0.0196904	515029	uridine phosphorylase 1
OSCAR	-0.330803	0.0266953
C19orf57	-0.331307	0.025004
SLC45A3	-0.331665	0.0248982	524303	solute carrier family 45 member 3
PTPN5	-0.33178	0.0246998	615850	protein tyrosine phosphatase, non-receptor type 5
TRIM25	-0.332163	0.0220555	510923	tripartite motif containing 25
PARM1	-0.333353	0.0255101	518368	prostate androgen-regulated mucin-like protein 1
MKI67	-0.334337	0.0240762
SLC13A5	-0.337769	0.0132074	507000	solute carrier family 13 member 5
BUB1	-0.339748	0.0183548	514777	BUB1 mitotic checkpoint serine/threonine kinase
GPR84	-0.339992	0.0208457	540044	G protein-coupled receptor 84
KIF4A	-0.343096	0.0160981	537127	kinesin family member 4A
SNCB	-0.346765	0.0132928	508421	synuclein beta
VLDLR	-0.349926	0.0113809	282123	very low density lipoprotein receptor
VWCE	-0.350166	0.0153124	787487	von Willebrand factor C and EGF domains
DGAT2	-0.352272	0.013269	404129	diacylglycerol O-acyltransferase 2
PQLC1	-0.352678	0.00866023
SELPLG	-0.355735	0.00641161	617434	selectin P ligand
SLC46A3	-0.356466	0.00543672	781117	solute carrier family 46 member 3
AGMAT	-0.360591	0.0121808	514509	agmatinase
SELE	-0.36234	0.0151683	281484	selectin E
SDS	-0.364609	0.00921606	514346	serine dehydratase
CLIC5	-0.366354	0.0107874	281696	chloride intracellular channel 5
KRT23	-0.366977	0.00474426	510914	keratin 23
CA4	-0.367405	0.012452	280741	carbonic anhydrase 4
NRAP	-0.368203	0.0135811	532640	nebulin related anchoring protein
CYB561	-0.372564	0.0120315	317663	cytochrome b-561
SLC25A37	-0.376487	0.000623953
PALM3	-0.376566	0.00854291	527118	paralemmin 3
TARM1	-0.377132	0.00687038	527020	T cell-interacting, activating receptor on myeloid cells 1
CD68	-0.380681	0.00451045	504960	CD68 molecule
TUBB3	-0.382653	0.00856199	768070	tubulin beta 3 class III
OSCP1	-0.384609	0.00700872	504974	organic solute carrier partner 1
HIST1H2BN	-0.392769	0.000570798	616627	histone cluster 1, H2bk
EPHX2	-0.395502	0.007217	511716	epoxide hydrolase 2
CDC20	-0.397782	0.00765254	515376	cell division cycle 20
MFSD4A	-0.400276	0.00731347	515128	major facilitator superfamily domain containing 4A
BCL7A	-0.401393	0.00464294
NCAPH	-0.411598	0.0020283	504477	non-SMC condensin I complex subunit H
ACTRT3	-0.418471	0.00192742	509723	actin related protein T3
ORC1	-0.424719	0.00442377	513523	origin recognition complex subunit 1
BDH1	-0.4258	0.00433824	534090	3-hydroxybutyrate dehydrogenase, type 1
SLIT1	-0.432599	0.00367498	510761	slit guidance ligand 1
OCSTAMP	-0.438585	0.0023159	509089	osteoclast stimulatory transmembrane protein
CCHCR1	-0.442529	0.000162927	514215	coiled-coil alpha-helical rod protein 1
ZCWPW1	-0.447332	0.000493285	514550	zinc finger CW-type and PWWP domain containing 1
PLA2G4F	-0.448237	0.002671	522866	phospholipase A2 group IVF
TARP	-0.47293	0.00152583	100335800	TCR gamma alternate reading frame protein
TCN1	-0.476678	0.000568957	616239	transcobalamin 1
PYGM	-0.478166	0.00136022	327664	phosphorylase, glycogen, muscle
ADGRE1	-0.501597	0.000672108
SLC28A3	-0.508583	0.000632968	508028	solute carrier family 28 member 3
CACNB3	-0.549648	0.00023108	282160	calcium voltage-gated channel auxiliary subunit beta 3
SEC16B	-0.551789	0.000213636	404548	SEC16 homolog B, endoplasmic reticulum export factor
ACE	-0.571025	0.000123549	509484	angiotensin I converting enzyme
