# Supplementary material for: Genome-Wide DNA Methylation and Gene Expression Profiles in Cows Subjected to Different Stress Level as Assessed by Cortisol in Milk
Source: Genes (Basel). 2020 Jul 25;11(8):850. doi: 10.3390/genes11080850 (PMC7464205; doi:10.3390/genes11080850)
Supplement: Supplementary file 1 [file genes-11-00850-s001.zip › Supplementary Table S6.xlsx]

## Sheet: Top 20 Kegg
Term	ID	Input number	Background number	q.value	Input	Hyperlink
Cell cycle	bta04110	7	115	0.00227083	ENSBTAG00000002719|ENSBTAG00000014380|ENSBTAG00000021181|ENSBTAG00000009223|ENSBTAG00000010384|ENSBTAG00000009819|ENSBTAG00000009586	http://www.genome.jp/kegg-bin/show_pathway?bta04110/bta:513523%09red/bta:515376%09red/bta:520188%09red/bta:515301%09red/bta:528453%09red/bta:514777%09red/bta:510120%09red
Influenza A	bta05164	7	157	0.011217	ENSBTAG00000004380|ENSBTAG00000030913|ENSBTAG00000025471|ENSBTAG00000009948|ENSBTAG00000008703|ENSBTAG00000009132|ENSBTAG00000008142	http://www.genome.jp/kegg-bin/show_pathway?bta05164/bta:280872%09red/bta:280943%09red/bta:511023%09red/bta:511037%09red/bta:510923%09red/bta:535490%09red/bta:347700%09red
African trypanosomiasis	bta05143	3	32	0.0148058	ENSBTAG00000007307|ENSBTAG00000038748|ENSBTAG00000025471	http://www.genome.jp/kegg-bin/show_pathway?bta05143/bta:281484%09red/bta:280943%09red/bta:280813%09red
Inflammatory bowel disease (IBD)	bta05321	4	60	0.0149006	ENSBTAG00000019567|ENSBTAG00000014983|ENSBTAG00000025471|ENSBTAG00000004378	http://www.genome.jp/kegg-bin/show_pathway?bta05321/bta:511022%09red/bta:280943%09red/bta:617967%09red/bta:614367%09red
Transcriptional misregulation in cancer	bta05202	6	145	0.0250341	ENSBTAG00000013736|ENSBTAG00000019354|ENSBTAG00000007693|ENSBTAG00000009132|ENSBTAG00000011833|ENSBTAG00000017339	http://www.genome.jp/kegg-bin/show_pathway?bta05202/bta:534626%09red/bta:534661%09red/bta:511037%09red/bta:618054%09red/bta:524303%09red/bta:538628%09red
Nitrogen metabolism	bta00910	2	17	0.0316348	ENSBTAG00000017733|ENSBTAG00000017969	http://www.genome.jp/kegg-bin/show_pathway?bta00910/bta:280740%09red/bta:280741%09red
Malaria	bta05144	3	48	0.0396868	ENSBTAG00000007307|ENSBTAG00000038748|ENSBTAG00000025471	http://www.genome.jp/kegg-bin/show_pathway?bta05144/bta:281484%09red/bta:280943%09red/bta:280813%09red
NF-kappa B signaling pathway	bta04064	4	84	0.041682	ENSBTAG00000040350|ENSBTAG00000014127|ENSBTAG00000025471|ENSBTAG00000009948	http://www.genome.jp/kegg-bin/show_pathway?bta04064/bta:280943%09red/bta:282023%09red/bta:281647%09red/bta:510923%09red
Ubiquitin mediated proteolysis	bta04120	5	125	0.0441753	ENSBTAG00000040350|ENSBTAG00000013057|ENSBTAG00000005564|ENSBTAG00000009819|ENSBTAG00000012989	http://www.genome.jp/kegg-bin/show_pathway?bta04120/bta:515376%09red/bta:509231%09red/bta:525906%09red/bta:281647%09red/bta:509471%09red
Proximal tubule bicarbonate reclamation	bta04964	2	22	0.0486633	ENSBTAG00000017733|ENSBTAG00000017969	http://www.genome.jp/kegg-bin/show_pathway?bta04964/bta:280740%09red/bta:280741%09red
Jak-STAT signaling pathway	bta04630	5	147	0.0757124	ENSBTAG00000019567|ENSBTAG00000004380|ENSBTAG00000005564|ENSBTAG00000014983|ENSBTAG00000004378	http://www.genome.jp/kegg-bin/show_pathway?bta04630/bta:511022%09red/bta:511023%09red/bta:617967%09red/bta:614367%09red/bta:509231%09red
p53 signaling pathway	bta04115	3	64	0.0770821	ENSBTAG00000009223|ENSBTAG00000002363|ENSBTAG00000003015	http://www.genome.jp/kegg-bin/show_pathway?bta04115/bta:509863%09red/bta:528453%09red/bta:538226%09red
Arachidonic acid metabolism	bta00590	3	67	0.0853512	ENSBTAG00000014127|ENSBTAG00000032068|ENSBTAG00000015241	http://www.genome.jp/kegg-bin/show_pathway?bta00590/bta:522866%09red/bta:282023%09red/bta:511716%09red
Phenylalanine, tyrosine and tryptophan biosynthesis	bta00400	1	5	0.085616	ENSBTAG00000005766	http://www.genome.jp/kegg-bin/show_pathway?bta00400/bta:104968452%09red
RIG-I-like receptor signaling pathway	bta04622	3	69	0.0910647	ENSBTAG00000008142|ENSBTAG00000025471|ENSBTAG00000009948	http://www.genome.jp/kegg-bin/show_pathway?bta04622/bta:535490%09red/bta:280943%09red/bta:510923%09red
Hypertrophic cardiomyopathy (HCM)	bta05410	3	73	0.0922951	ENSBTAG00000024950|ENSBTAG00000021808|ENSBTAG00000025471	http://www.genome.jp/kegg-bin/show_pathway?bta05410/bta:509484%09red/bta:282160%09red/bta:280943%09red
Nicotine addiction	bta05033	2	35	0.0933551	ENSBTAG00000001088|ENSBTAG00000011833	http://www.genome.jp/kegg-bin/show_pathway?bta05033/bta:529659%09red/bta:534626%09red
Protein digestion and absorption	bta04974	3	75	0.0952951	ENSBTAG00000011802|ENSBTAG00000010179|ENSBTAG00000013472	http://www.genome.jp/kegg-bin/show_pathway?bta04974/bta:511422%09red/bta:282188%09red/bta:507881%09red
Hepatitis C	bta05160	4	120	0.103781	ENSBTAG00000008703|ENSBTAG00000004380|ENSBTAG00000005564|ENSBTAG00000025471	http://www.genome.jp/kegg-bin/show_pathway?bta05160/bta:511023%09red/bta:347700%09red/bta:509231%09red/bta:280943%09red
Hepatitis B	bta05161	4	135	0.109114	ENSBTAG00000019293|ENSBTAG00000008142|ENSBTAG00000004380|ENSBTAG00000025471	http://www.genome.jp/kegg-bin/show_pathway?bta05161/bta:535490%09red/bta:280943%09red/bta:526233%09red/bta:511023%09red
