# Supplementary figures and images for: Genome-Wide DNA Methylation and Gene Expression Profiles in Cows Subjected to Different Stress Level as Assessed by Cortisol in Milk
Source: MDPI journal article supplement (doi:10.3390/genes11080850), 2020-07-25

**Figure S2.** Overlap of DMGs and DEGs in the two High and Low cortisol groups.

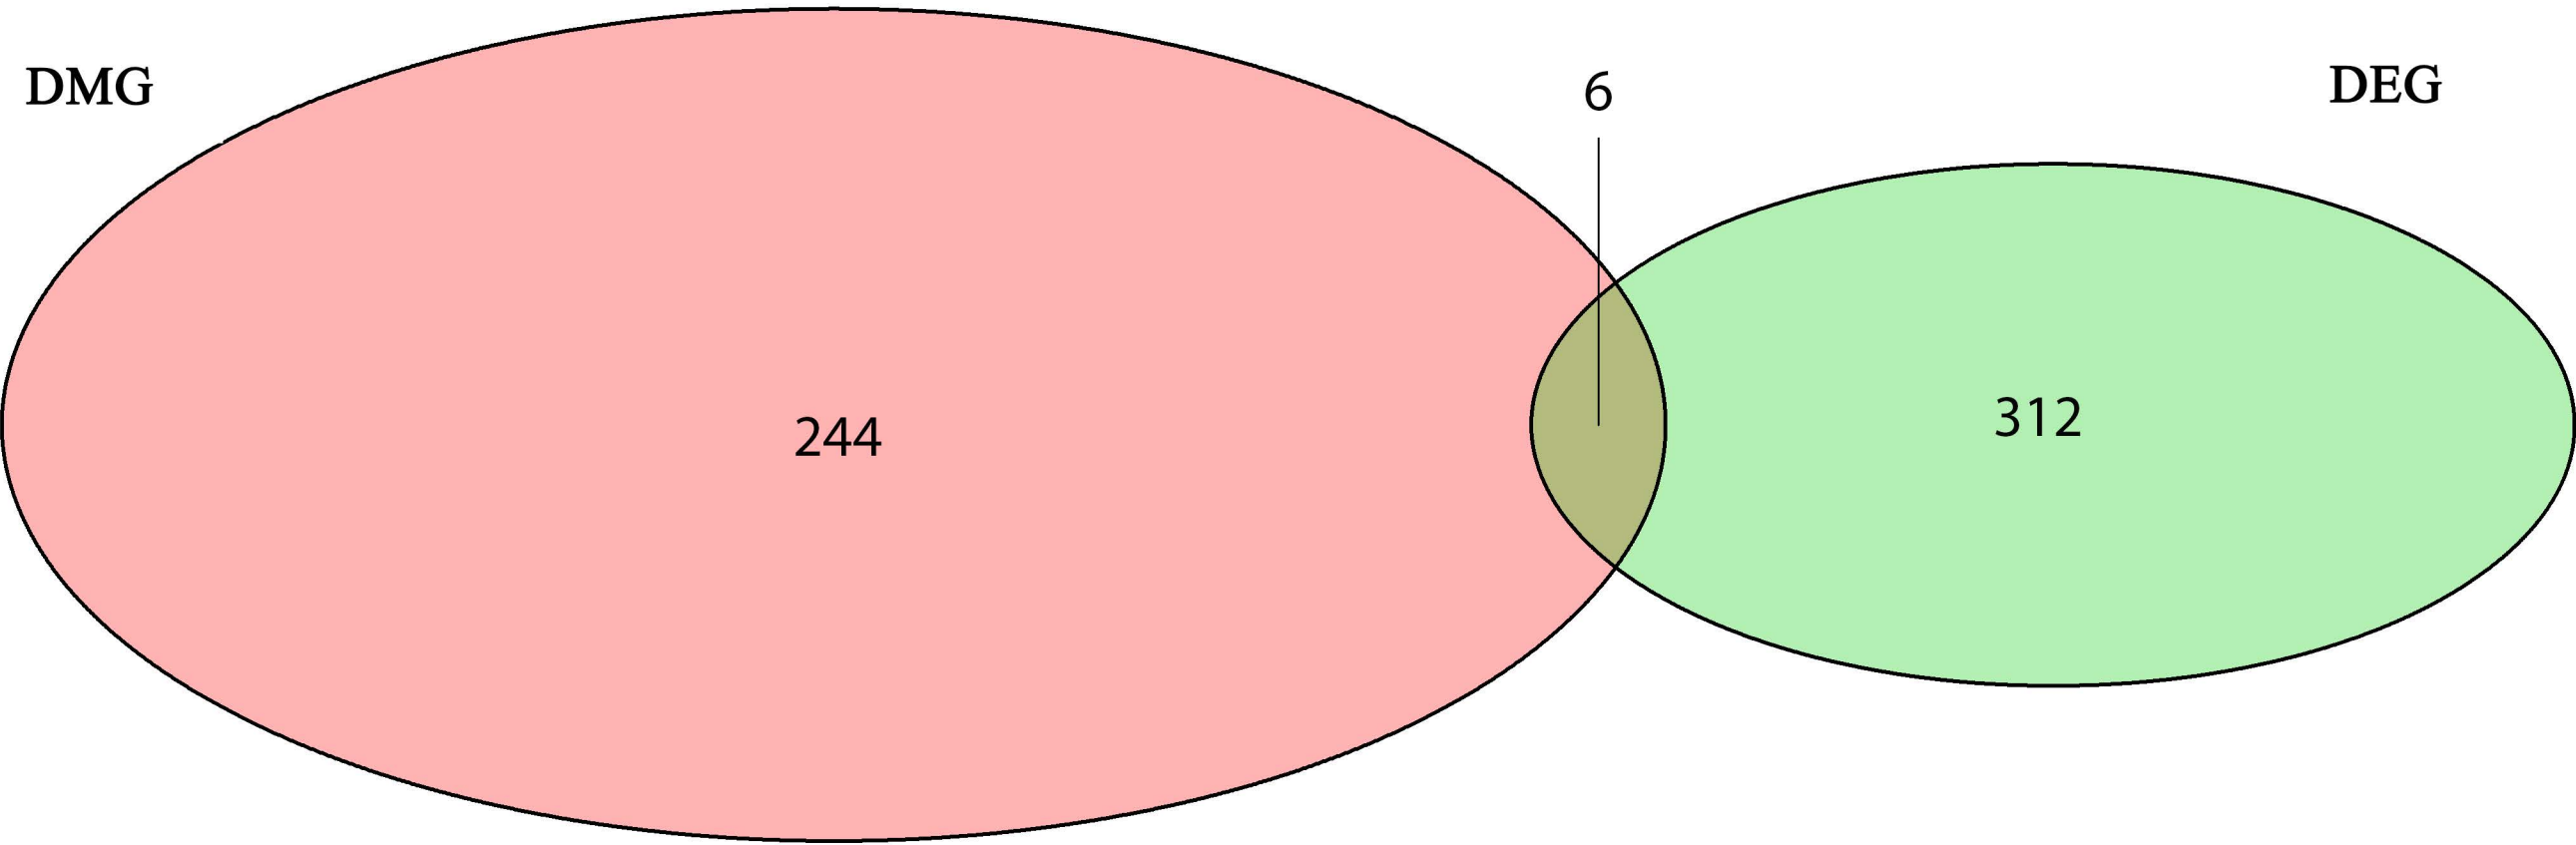

Supplement: s1 [file s1]
